# Supplementary material for: Enantioselective syntheses of β-amino alcohols catalyzed by recyclable chiral Fe(iii) metal complex
Source: Royal Society of Chemistry journal article supplement (doi:10.1039/c5ra23600b), 2016-01-01
Supplement: c5ra23600b1.pdf [file c5ra23600b1.pdf]

## Enantioselective syntheses of $\beta$ -amino alcohols catalyzed by recyclable chiral Fe(III) metal complex

Rajkumar Tak<sup>a,b</sup>, Manish Kumar<sup>a,c</sup>, Rukhsana I. Kureshy<sup>\*a,b</sup>, Manoj Kumar Choudhary<sup>a,b</sup>, Noor-ul H. Khan<sup>a,b</sup>, Sayed H. R. Abdi<sup>a,b</sup>, Hari C. Bajaj<sup>a,b</sup>

<sup>a</sup>Discipline of Inorganic Materials and Catalysis, CSIR- Central Salt and Marine Chemicals Research Institute.

<sup>b</sup>Academy of Scientific and Innovative Research, Central Salt and Marine Chemicals Research Institute (CSMCRI), Council of Scientific & Industrial Research (CSIR), G. B. Marg, Bhavnagar- 364 002, Gujarat, India.

<sup>c</sup>Ruđer Bošković Institute, Bijenička 54, 10000 Zagreb, Croatia.

E-mail: rukhsana93@yahoo.co.in

| List of Contents                                                                                                      | Page No |
|-----------------------------------------------------------------------------------------------------------------------|---------|
| 1. General information                                                                                                | 1       |
| 2. Synthesis and characterization of the ligands                                                                      | 2       |
| 3. Typical experimental procedure for ring opening of epoxides                                                        | 2       |
| 4. Characterization data and HPLC profile of products                                                                 | 3       |
| 5. <sup>1</sup> H and <sup>13</sup> C NMR spectra of Products                                                         | 33      |
| 6. UV-Vis titration using Job's method                                                                                | 48      |
| 7. Plausible structure, MS and MALDI spectra of the complex<br>[Fe <sub>2</sub> L <sub>5</sub> a(acac) <sub>2</sub> ] | 48      |
| 8. Recyclability of the complex                                                                                       | 51      |
| 9. ICP analysis                                                                                                       | 51      |
| 10. References                                                                                                        | 52      |

### 1. General Information

Fe(acac)<sub>3</sub>, FeCl<sub>3</sub>, (*S*)-1,1'-binaphthyl-2,2'-diol / (*R*)-1,1'-binaphthyl-2,2'-diol, aniline, 2-methoxyaniline, 4-methoxyaniline, 4-methylaniline, 2-chloroaniline, 4-nitroaniline, 4-ethylaniline, *meso*-stilbene oxide, *cis*-butene oxide and cyclohexene oxide were purchased from

Aldrich Chemicals and were used as received. All the solvents used in the present study were dried by known purification technique. NMR spectra were obtained with 500 MHz / 200 MHz and are referenced internally with TMS. Enantiomeric excess (ee) were determined by HPLC using Daicel Chiralpak OD, OJ and AD chiral columns with 2-propanol/hexane as eluent. FT-IR spectra were carried out using KBr. Optical rotations were determined by automatic polarimeter (Digipol 781). For the product purification flash chromatography was performed using silica gel 100-200 mesh. The following abbreviations were used to designate chemical shift multiplicities: s = singlet, d = doublet, t = triplet, m = multiplet, br = broad, q = Quintet, coupling constants are given in Hertz (Hz).

## 2. Synthesis and characterization of the ligands:

Chiral ligands **L**<sub>1</sub>-**L**<sub>7</sub> were prepared according to the methods reported in the literature. For the characterization of the ligands.<sup>1-4</sup>

## 3. Typical experimental procedure for ring opening of epoxides

To a 5 ml round bottom flask fitted with rubber septum and equipped with a magnetic stirring bar, a solution of chiral ligands **L**<sub>1</sub>-**L**<sub>7</sub> (0.005 mmol) in DCM, 0.8 ml and iron salts (0.01 mmol) were charged and the resulting solution was allowed to stir at room temperature (27±2 °C) for 1 h. Subsequently, an appropriate epoxide viz., *meso*-stilbene oxide **5**/ *cis*-butene oxide **7**/cyclohexene oxide **8** (0.2 mmol) was added to the above stirring solution and after a gap of 10 min, appropriate anilines **6a-1** (0.22 mmol) was added and the reaction mixture was allowed to stir for the specified time. The progress of the reaction was checked on TLC using hexane/ethyl acetate (8/2) as mobile phase. After the completion of reaction, solvent was removed under vacuum and the product was purified by column chromatography using silica gel 100-200 mesh as stationary phase and hexane: ethyl acetate (8:2) as mobile phase.

#### 4. Characterization data and HPLC profile of products:

##### (1*S*,2*S*)-1,2-Diphenyl-2-(phenylamino)-ethanol [6'a] <sup>[1,3]</sup> :

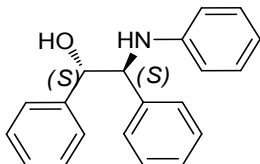

The title compound was isolated by column chromatography (hexane/AcOEt: 90/10) as a white solid; Melting point: 100–102 °C; The *ee* >99% on HPLC (Chiralpak AD column) mobile phase 92/8 n-hexane/*i*-PrOH; flow rate 0.6 mL/min., retention time, (*1S,2S*): 17.31 min., (*1R,2R*): 20.8 min.; <sup>1</sup>H NMR (200MHz, CDCl<sub>3</sub>, δ ppm): δ = 7.17–7.27 (m, 10 H), 7.03–7.11 (t, *J* = 8.0 Hz, 2 H), 6.60 (t, *J* = 8.0 Hz, 1 H), 6.52 (d, *J* = 8.0 Hz, 2 H), 4.86 (d, *J* = 5.8 Hz, 1 H), 4.52 (d, *J* = 5.8 Hz, 1 H), 2.64 (bs, OH); <sup>13</sup>C NMR (200 MHz, CDCl<sub>3</sub>, δ ppm): δ = 148.91, 141.87, 137.42, 130.72, 130.22, 129.91, 129.56, 129.18, 128.94, 128.22, 119.56, 115.79, 79.72, 66.38; FTIR (KBr): ν = 3545, 3405, 3026, 2883, 2847, 1600, 1502, 1450, 1427, 1322, 1030, 753, 696 cm<sup>-1</sup>; TOF-MS (ESI+): *m/z* 290 [M+H]<sup>+</sup>, 272 (base peak) [M–OH]<sup>+</sup>.

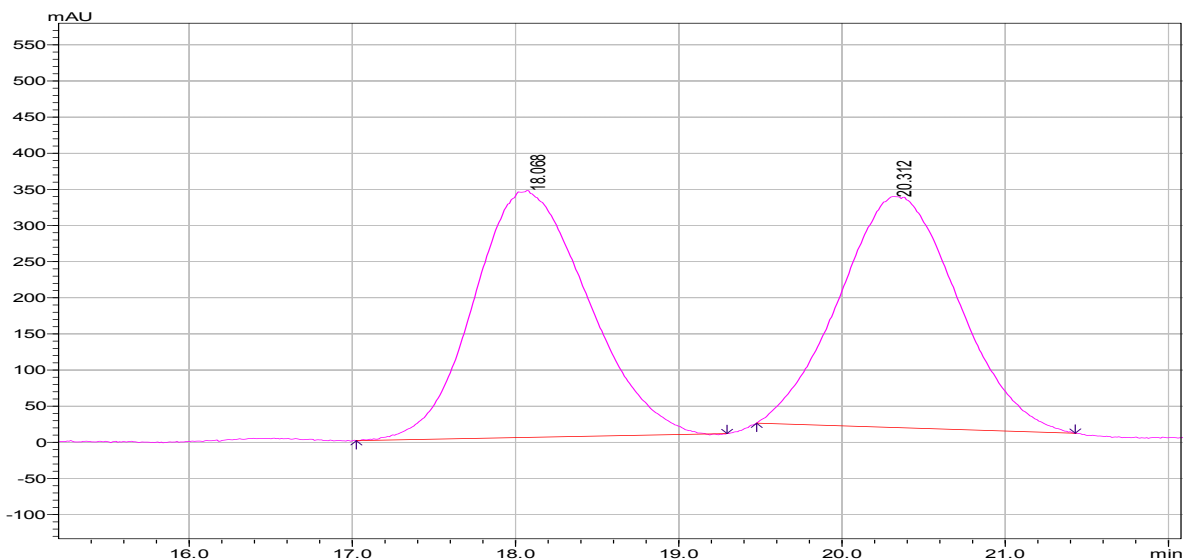

| Peak | Ret. Time | Area     | Peak Start | Peak End | Area%   |
|------|-----------|----------|------------|----------|---------|
| 1    | 18.068    | 16554236 | 17.024     | 19.296   | 50.5598 |
| 2    | 20.312    | 16187629 | 19.477     | 21.429   | 49.4402 |

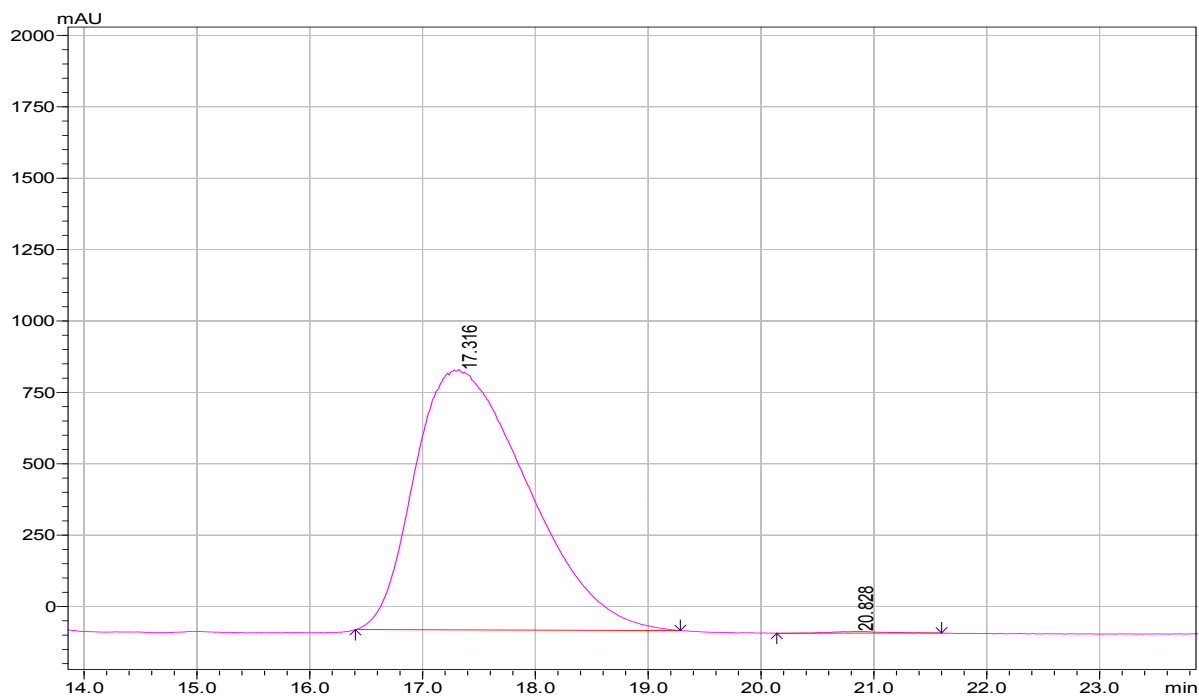

| Peak | Ret. Time | Area     | Peak Start | Peak End | Area%   |
|------|-----------|----------|------------|----------|---------|
| 1    | 17.316    | 63445475 | 16.405     | 19.285   | 99.7351 |
| 2    | 20.828    | 168484   | 20.139     | 21.600   | 0.2649  |

**(1*S*,2*S*)-1,2-Diphenyl-2-(4-methyl-phenylamino)-ethanol [6'b] <sup>[1,3]</sup>:**

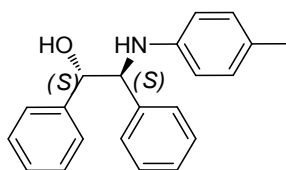

The title compound was isolated by column chromatography (hexane/AcOEt 90/10) as a white solid; Melting point: 85°C; The *ee* >99% on HPLC (Chiralpak OD column,) mobile phase, 92/8 hexane/*i*-PrOH; flow rate 0.6 mL/min., retention time (*1S*,*2S*): 27.3 min., (*1R*,*2R*): 31.5 min.; <sup>1</sup>H

NMR (200 MHz, CDCl<sub>3</sub>,  $\delta$  ppm):  $\delta$  = 7.21–7.25 (m, 10 H), 6.85 (d,  $J$  = 8.0 Hz, 2 H), 6.44 (d,  $J$  = 8.0 Hz, 2 H), 4.82 (d,  $J$  = 6.2 Hz, 1 H), 4.46 (d,  $J$  = 6.2 Hz, 1 H), 2.67 (bs, 1 H), 2.16 (s, 3 H);  
<sup>13</sup>C NMR (200 MHz, CDCl<sub>3</sub>,  $\delta$  ppm):  $\delta$  = 144.9, 140.5, 140.2, 129.6, 128.5, 128.2, 127.8, 127.3, 126.6, 114.3, 78.0, 65.2, 20.3; FTIR (KBr):  $\nu$  = 3398, 3062, 3028, 2858, 2832, 1816, 1615, 1517, 1491, 1258, 1043, 814, 763, 700 cm<sup>-1</sup>; TOF-MS (ESI+):  $m/z$  304 [M+H]<sup>+</sup>, 286 [M-OH]<sup>+</sup>.

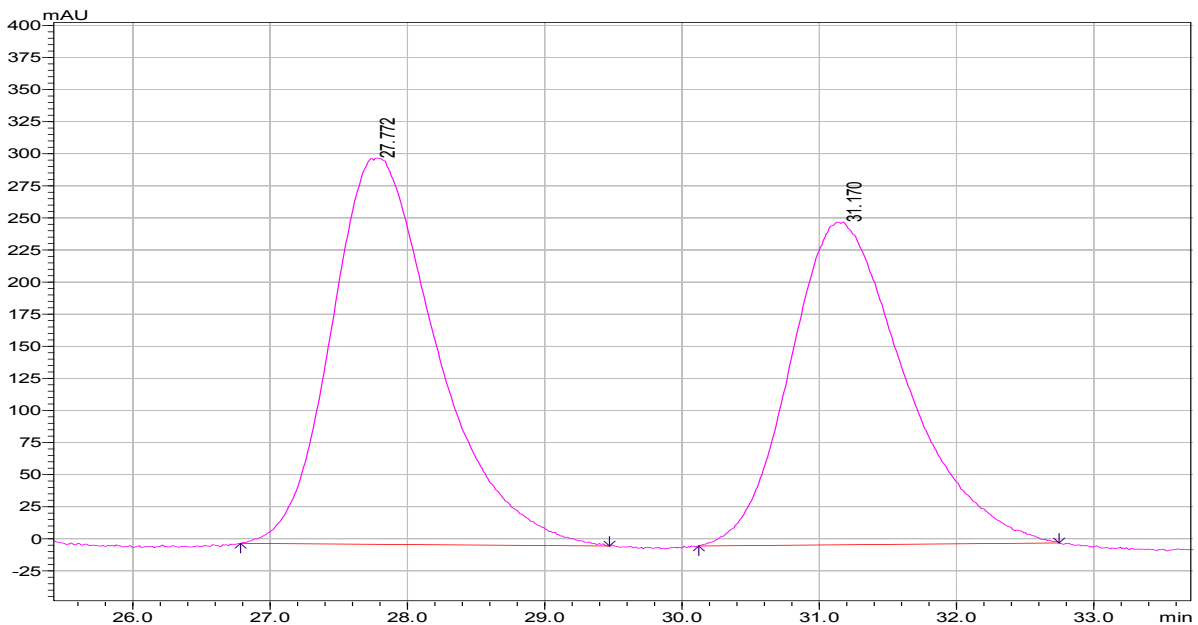

| Peak | Ret. Time | Area     | Peak Start | Peak End | Area%   |
|------|-----------|----------|------------|----------|---------|
| 1    | 27.772    | 16170220 | 26.784     | 29.472   | 52.4441 |
| 2    | 31.170    | 14663037 | 30.123     | 32.747   | 47.5559 |

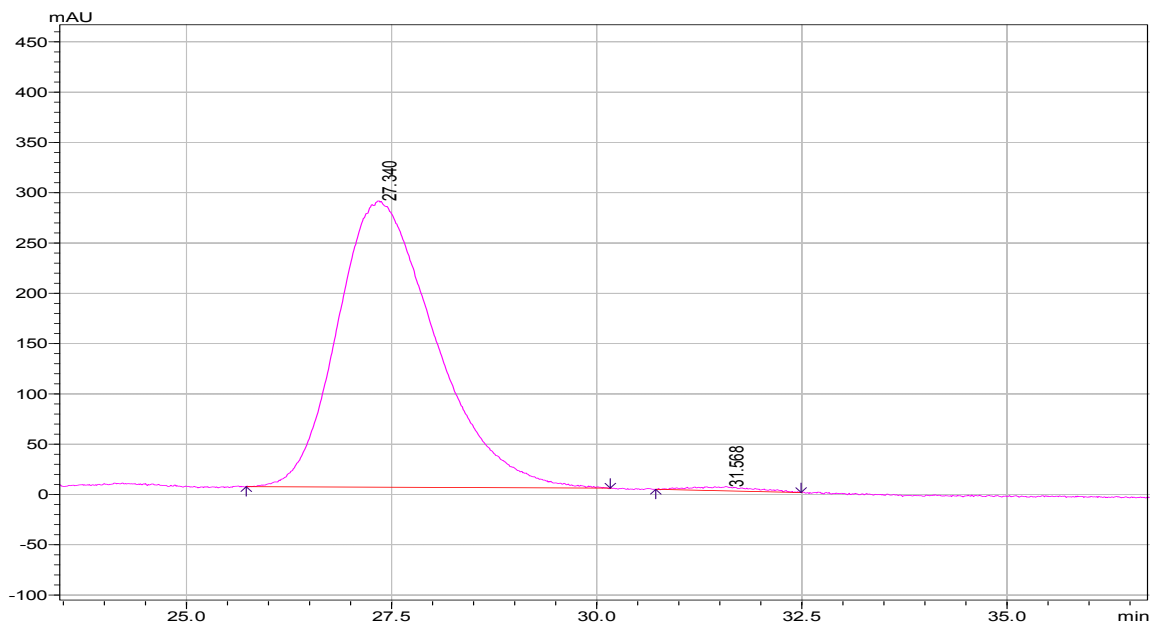

| Peak | Ret. Time | Area     | Peak Start | Peak End | Area%   |
|------|-----------|----------|------------|----------|---------|
| 1    | 27.340    | 23565831 | 25.728     | 30.165   | 99.5854 |
| 2    | 31.568    | 217516   | 30.720     | 32.491   | 0.4146  |

**(1*S*,2*S*)-1,2-diphenyl-2-(4-ethyl-phenylamino)-ethanol [6'*c*] [1,3]:**

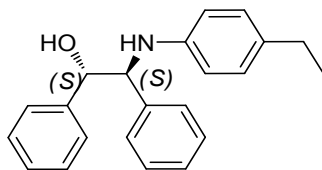

The title compound was isolated by column chromatography (hexane/AcOEt 90/10) as a white solid; Melting point: 85°C; The *ee* 90% on HPLC (Chiralpak OD column,) mobile phase, 92/8 hexane/*i*-PrOH; flow rate 0.6 mL/min., retention time (*1S,2S*): 20.9 min., (*1R,2R*): 26.03 min.; <sup>1</sup>H NMR (500 MHz, CDCl<sub>3</sub>, δ ppm): δ = 7.25–7.06 (m, 10 H), 6.88 (d, *J* = 8.5 Hz, 2 H), 6.44 (d, *J* = 8.5 Hz, 2 H), 5.00 (d, *J* = 5.0 Hz, 1 H), 4.61 (d, *J* = 5.0 Hz, 1 H), 2.19 (q, 2 H), 1.102 (t, *J* =

15.0 Hz, 3 H),  $^{13}\text{C}$  NMR (200 MHz,  $\text{CDCl}_3$ ,  $\delta$  ppm):  $\delta = 144.69, 140.07, 138.81, 133.82, 128.26, 128.22, 127.96, 127.91, 127.57, 114.14, 78.0, 64.04, 27.87, 15.81$ ; FTIR (KBr):  $\nu = 3398, 3062, 3028, 2857, 2832, 1814, 1616, 1519, 1492, 1257, 1045, 816, 769, 701\text{ cm}^{-1}$ ; TOF-MS (ESI+):  $m/z$  318  $[\text{M}+\text{H}]^+$ , 334  $[\text{M}-\text{OH}]^+$ .

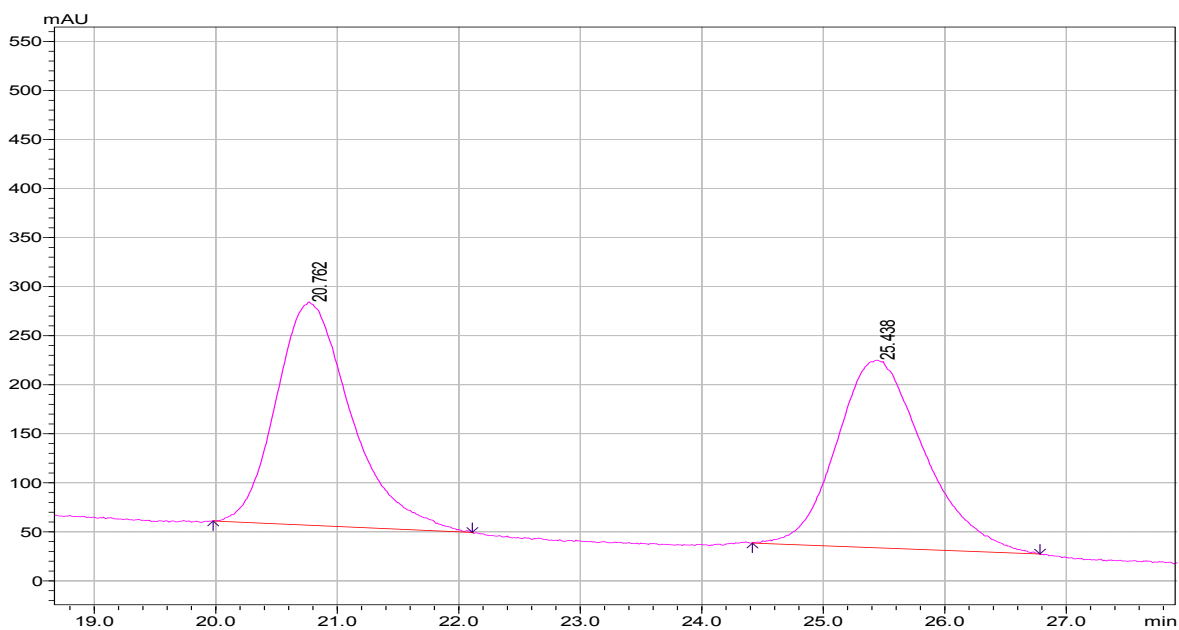

| Peak | Ret. Time | Area    | Peak Start | Peak End | Area%   |
|------|-----------|---------|------------|----------|---------|
| 1    | 20.762    | 9774345 | 19.979     | 22.112   | 50.3976 |
| 2    | 25.438    | 9620109 | 24.416     | 26.784   | 49.6024 |

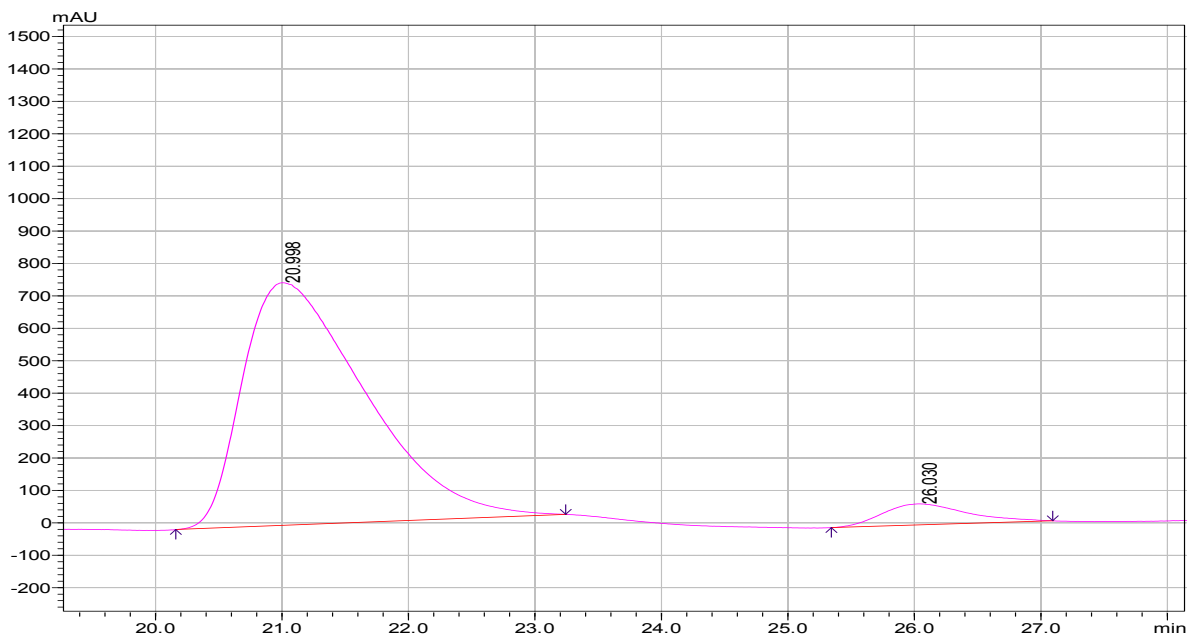

| Peak | Ret. Time | Area     | Peak Start | Peak End | Area%   |
|------|-----------|----------|------------|----------|---------|
| 1    | 20.998    | 50374644 | 20.160     | 23.243   | 95.3926 |
| 2    | 26.030    | 2992523  | 25.344     | 27.093   | 4.6074  |

**(1*S*,2*S*)-1,2-Diphenyl-2-(4-methoxy-phenylamino)-ethanol [6'd] <sup>[1,3]</sup>:**

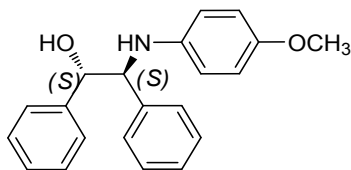

The title compound was isolated by column chromatography (hexane/AcOEt 90/10) as a yellow solid; Melting point: 98–102°C; The *ee* 95% on HPLC (Chiralpak OD column) mobile phase, 90/10 n-hexane/*i*-PrOH; flow rate 1 mL/min., retention time, (*1S*,*2S*): 20.21 min., (*1R*,*2R*): 23.61 min., <sup>1</sup>H NMR (200 MHz, CDCl<sub>3</sub>, δ ppm): δ = 7.20–7.26 (m, 10 H), 6.66 (d, *J* = 8.8 Hz, 2 H), 6.50 (d, *J* = 8.8 Hz, 2 H), 4.82 (d, *J* = 6.4 Hz, 1 H), 4.41 (d, *J* = 6.4 Hz, 1 H), 3.69 (s, 3 H), <sup>13</sup>C NMR (200 MHz, CDCl<sub>3</sub>, δ ppm): δ = 152.52, 141.28, 140.55, 140.19, 128.46, 128.15, 127.44,



127.32, 126.66, 115.75, 114.64, 78.09, 66.17, 55.65, 29.67; FTIR (KBr):  $\nu = 3483, 3393, 3026, 2964, 2833, 1807, 1510, 1453, 1254, 1024, 819, 753, 700 \text{ cm}^{-1}$ ; TOF-MS (ESI+):  $m/z$  320  $[M+H]^+$ .

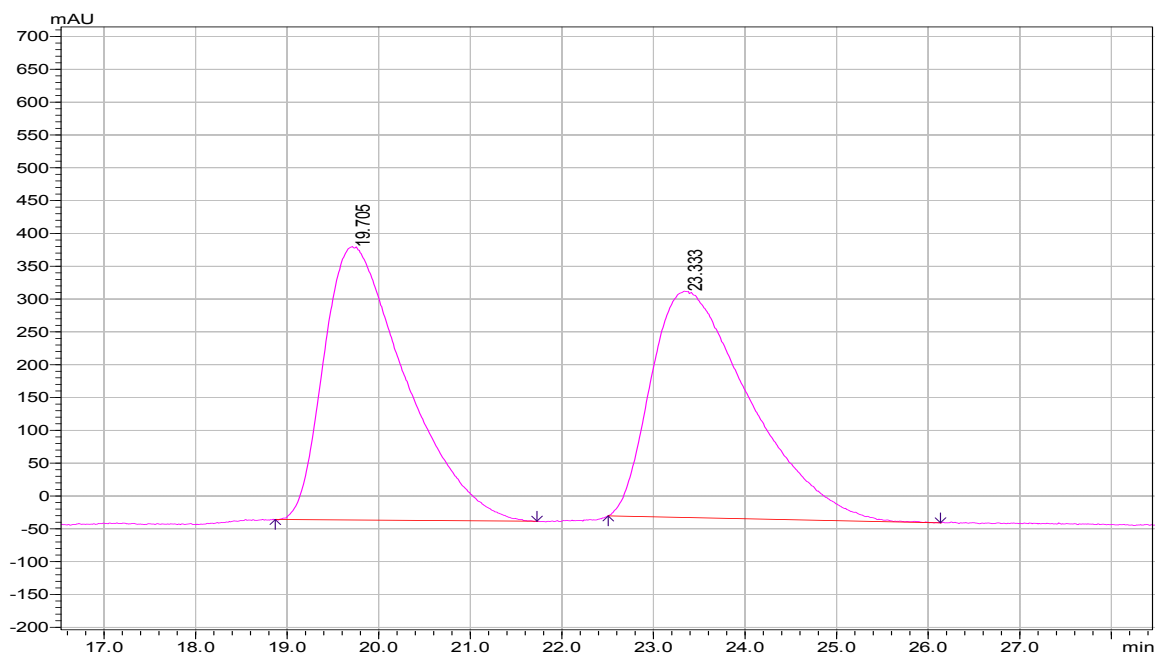

| Peak | Ret. Time | Area     | Peak Start | Peak End | Area%   |
|------|-----------|----------|------------|----------|---------|
| 1    | 19.705    | 25848481 | 18.869     | 21.728   | 49.8879 |
| 2    | 23.333    | 25964631 | 22.507     | 26.133   | 50.1121 |

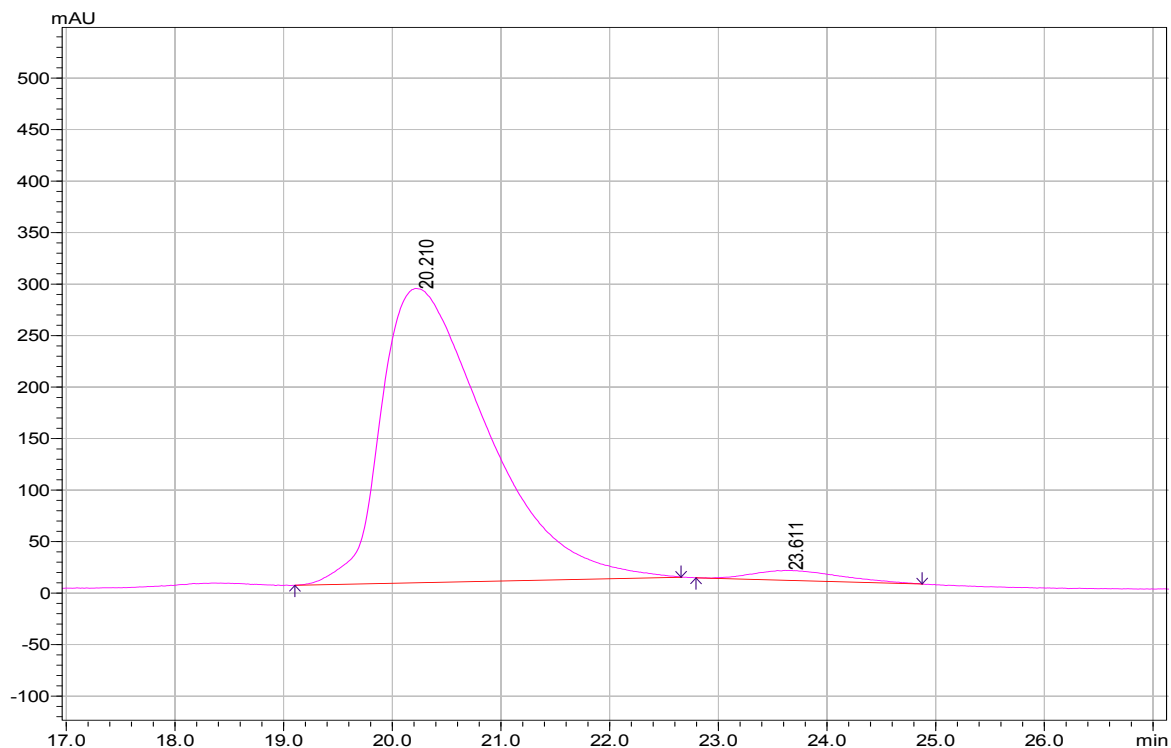

| Peak | Ret. Time | Area     | Peak Start | Peak End | Area%   |
|------|-----------|----------|------------|----------|---------|
| 1    | 20.210    | 19443320 | 19.104     | 22.656   | 97.2354 |
| 2    | 23.611    | 552823   | 22.795     | 24.875   | 2.7646  |

**(1*S*,2*S*)-1,2-Diphenyl-2-(2-methoxy-phenylamino)-ethanol [6'e] <sup>[1,3]</sup>:**

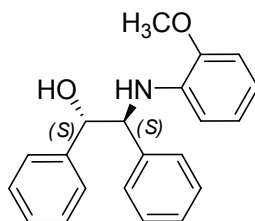

The title compound was isolated by column chromatography (hexane/AcOEt 90/10) as a white solid, Melting point: 93-95°C, ee 28% on HPLC (Chiralpak OD column) mobile phase 80/20 hexane/*i*-PrOH, flow rate 0.8 mL/min, retention time, (*1S*, *2S*): 27.42 min, (*1R*, *2R*): 32.14 min.; <sup>1</sup>H NMR (200 MHz, CDCl<sub>3</sub>, δ ppm): δ = 7.21–7.26 (m, 10 H), 6.74 (d, *J* = 8.0 Hz, 1 H), 6.62 (t,

$J = 6.4$  Hz, 2 H), 6.38 (d,  $J = 7.2$  Hz, 1 H), 5.19 (bs, NH), 4.87 (d,  $J = 6.4$  Hz, 1 H), 4.50 (d,  $J = 6.4$  Hz, 1 H), 3.88 (s, 3 H),  $^{13}\text{C}$  NMR (200 MHz,  $\text{CDCl}_3$ ,  $\delta$  ppm ):  $\delta = 147.42, 140.63, 140.14, 137.11, 129.76, 129.00, 128.40, 128.10, 127.79, 127.39, 127.31, 126.75, 121.05, 117.20, 109.60, 78.33, 64.94, 55.62$  ; FT-IR (KBr):  $\nu = 3407, 3062, 3030, 2936, 2835, 1810, 1698, 1601, 1515, 1248, 1027, 846, 740, 700$   $\text{cm}^{-1}$ ; TOF-MS (ESI+):  $m/z$  320  $[\text{M}+\text{H}]^+$ , 302  $[\text{M}-\text{OH}]^+$ .

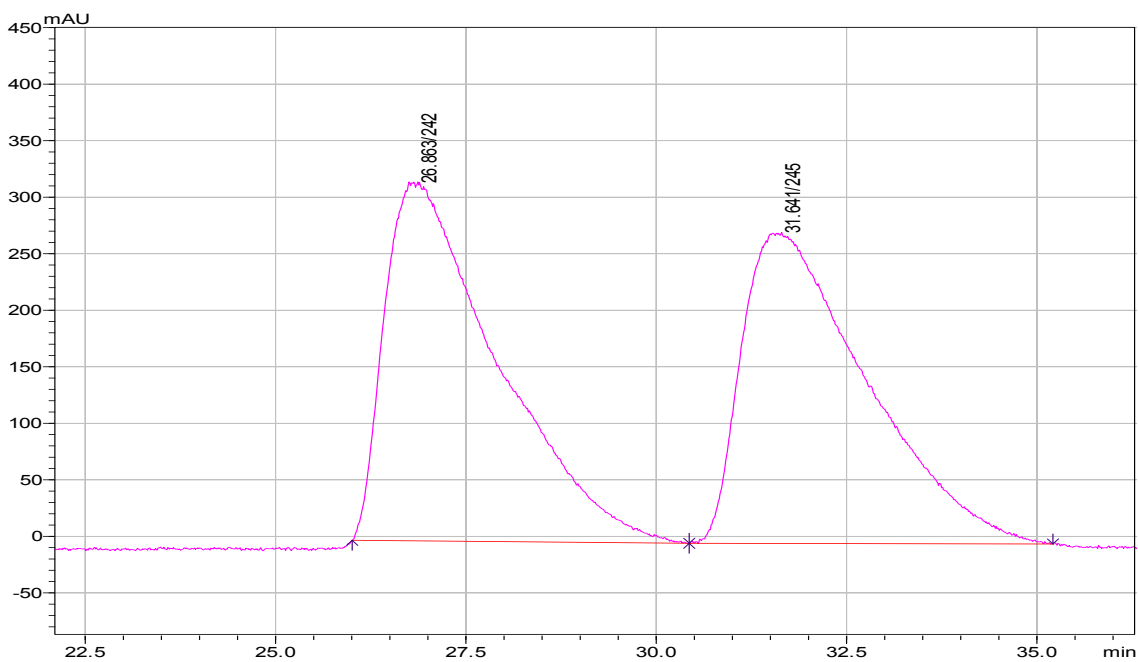

| Peak | Ret. Time | Area     | Peak Start | Peak End | Area%   |
|------|-----------|----------|------------|----------|---------|
| 1    | 26.863    | 32531113 | 26.005     | 30.432   | 50.9541 |
| 2    | 31.641    | 31312832 | 30.432     | 35.211   | 49.0459 |

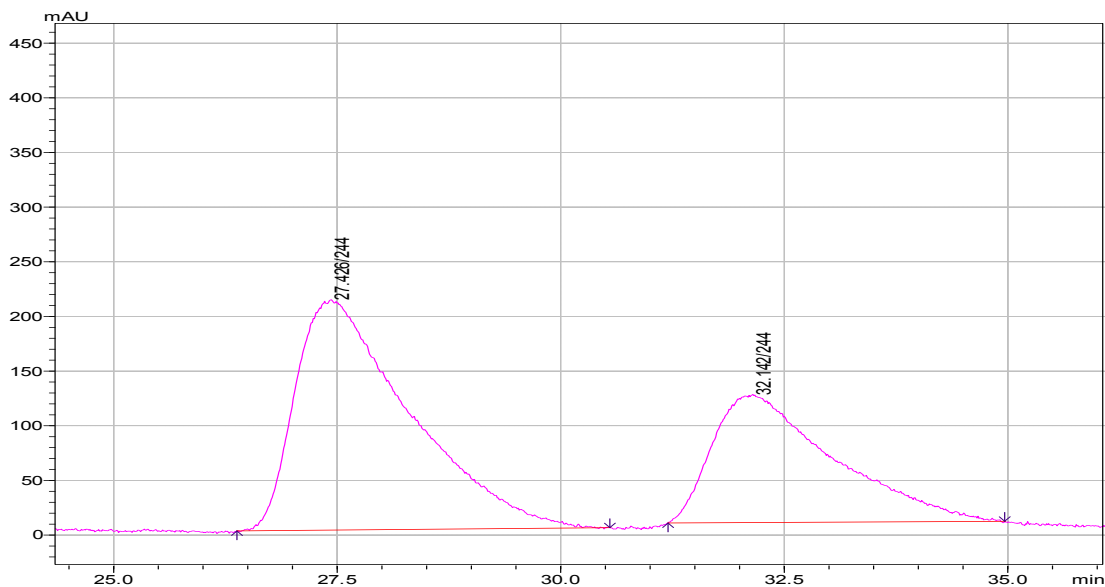

| Peak | Ret. Time | Area     | Peak Start | Peak End | Area%   |
|------|-----------|----------|------------|----------|---------|
| 1    | 27.426    | 18736196 | 26.379     | 30.549   | 64.0062 |
| 2    | 32.142    | 11000869 | 31.200     | 34.965   | 35.9938 |

**(1*S*,2*S*)-1,2-diphenyl-2-(4-chloro-phenylamino)-ethanol [6'*f*] <sup>[1,3]</sup>:**

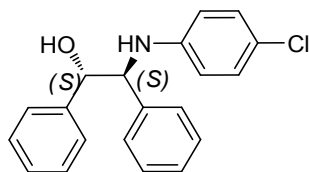

The title compound was isolated by column chromatography (hexane/ AcOEt, 90:10) as a white solid; m.p. 95°C; The *ee* 90% on HPLC (Chiralpak AD Column) mobile phase 90:10 hexane/*i*PrOH; flow rate 0.8 mL/min., retention time (1*S*,2*S*) 24.07 min., (1*R*,2*R*): 28.11 min.; <sup>1</sup>H NMR (500 MHz, CDCl<sub>3</sub>, δ ppm): δ = 7.16–7.26 (m, 10 H), 6.95 (d, *J* = 8.0 Hz, 2 H), 6.39 (d, *J* = 8.8 Hz, 2 H), 4.82 (d, *J* = 5.6 Hz, 1 H), 4.72 (br. s, 1 H), 4.44 (d, *J* = 5.6 Hz, 1 H), 2.50 (br. s, 1 H); <sup>13</sup>C NMR (200 MHz, CDCl<sub>3</sub>, δ ppm): δ = 144.9, 142.3, 141.6, 130.5, 130.2, 129.92, 129.59, 129.43, 129.11, 121.8, 114.7, 79.9, 66.2; FTIR (KBr): ν = 3396, 3063, 3031, 2960, 2929, 2860,

1812, 1722, 1599, 1496, 1268, 1073, 820, 739, 700  $\text{cm}^{-1}$ ; TOF-MS (ESI+):  $m/z = 324 [M+H]^+$ ,  
347  $[M+Na]^+$ .

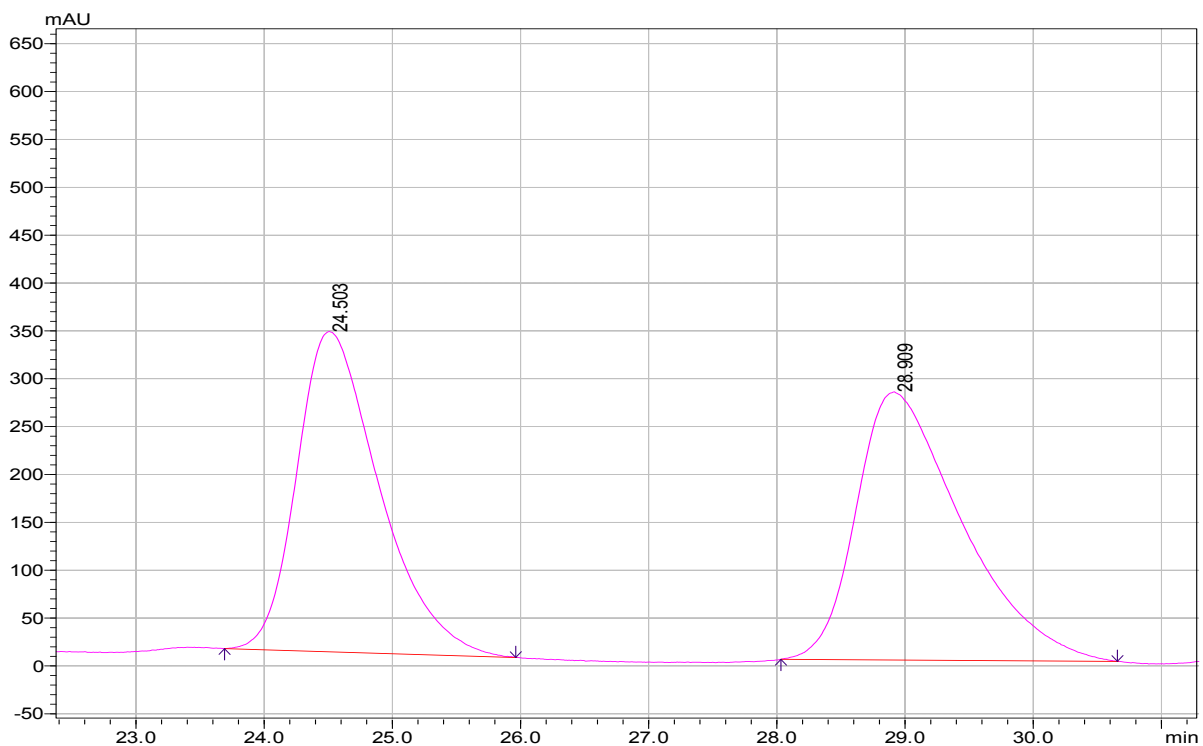

| Peak | Ret. Time | Area     | Peak Start | Peak End | Area%   |
|------|-----------|----------|------------|----------|---------|
| 1    | 24.503    | 15004590 | 23.691     | 25.963   | 48.4154 |
| 2    | 28.909    | 15986780 | 28.032     | 30.656   | 51.5846 |

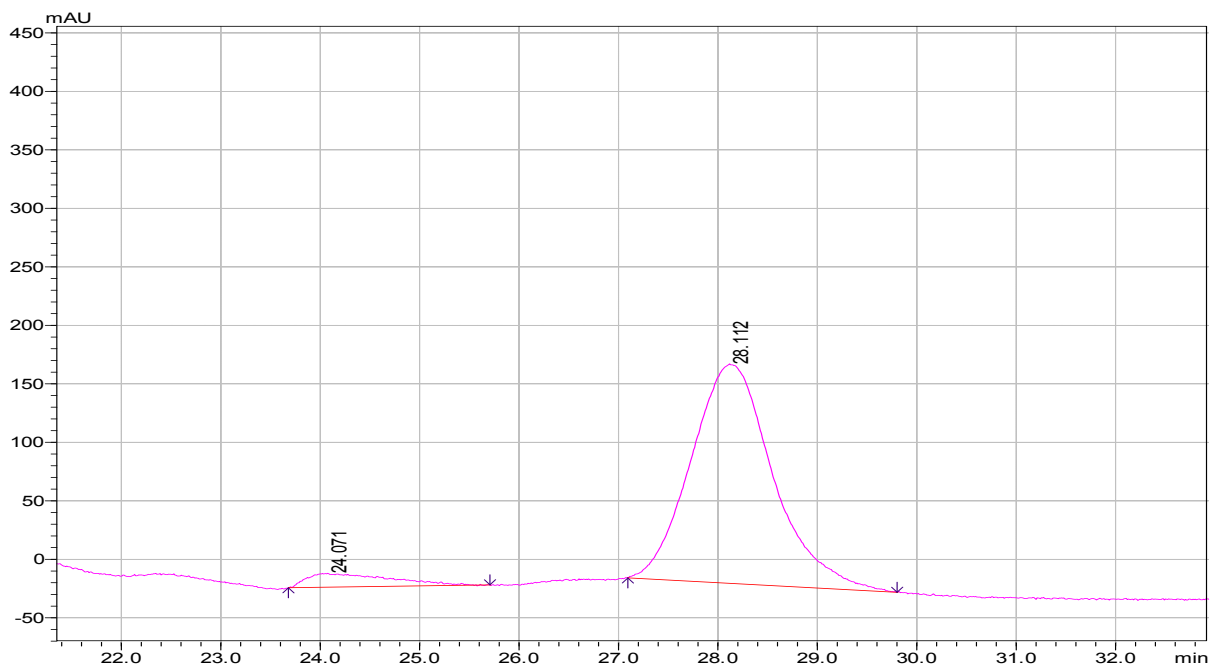

| Peak | Ret. Time | Area     | Peak Start | Peak End | Area%   |
|------|-----------|----------|------------|----------|---------|
| 1    | 24.071    | 673759   | 23.680     | 25.707   | 4.9194  |
| 2    | 28.112    | 10708500 | 27.093     | 29.803   | 95.0806 |

**(1*S*,2*S*)-2-(2-Chlorophenylamino)-1,2-diphenylethanol [6'g] <sup>[1,3]</sup>:**

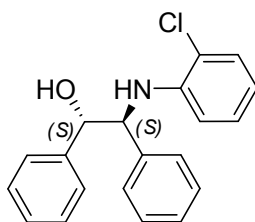

The title compound was isolated by column chromatography (hexane/AcOEt, 90:10) as a white solid; m.p. 95 °C; *ee* 38 % on HPLC(Chiralpak OD Column) mobile phase 80:20 hexane/*i*PrOH; flow rate 1 mL/min, retention time (1*S*,2*S*) 10.15 min,(1*R*,2*R*): 10.94 min. <sup>1</sup>H NMR (200 MHz, CDCl<sub>3</sub>): δ= 7.16–7.25 (m, 11 H), 6.81 (t, *J* = 8.0 Hz, 1 H), 6.47 (t, *J* = 8.0 Hz, 1 H), 5.41 (bs, 1 H), 4.88 (d, *J* = 5.0 Hz, 1 H), 4.51 (d, *J* = 5.0 Hz, 1 H), 2.44 (bs, 1H): <sup>13</sup>C NMR (200 MHz,

CDCl<sub>3</sub>):  $\delta$  = 144.98, 142.39, 141.62, 130.54, 130.21, 129.92, 129.59, 129.43, 129.11, 128.43, 121.84, 119.51, 114.7, 79.93, 66.20; FTIR (KBr):  $\nu$  = 3396, 3063, 3031, 2960, 2929, 2860, 1812, 1722, 1599, 1496, 1268, 1073, 820, 739, 700 cm<sup>-1</sup>; TOF-MS (ESI+):  $m/z$  324 [M + H]<sup>+</sup>.

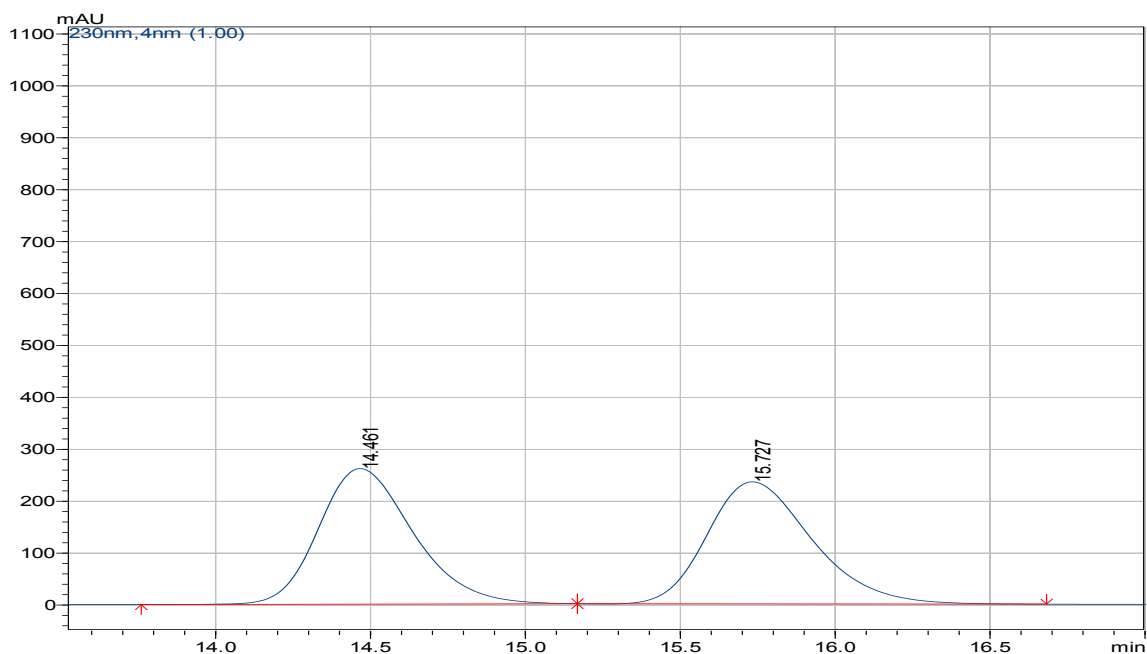

| Peak# | Ret. Time | Area     | Peak Start | Peak End | Area%   |
|-------|-----------|----------|------------|----------|---------|
| 1     | 14.461    | 19206379 | 13.760     | 15.168   | 50.0494 |
| 2     | 15.727    | 19168499 | 15.168     | 16.683   | 49.9506 |

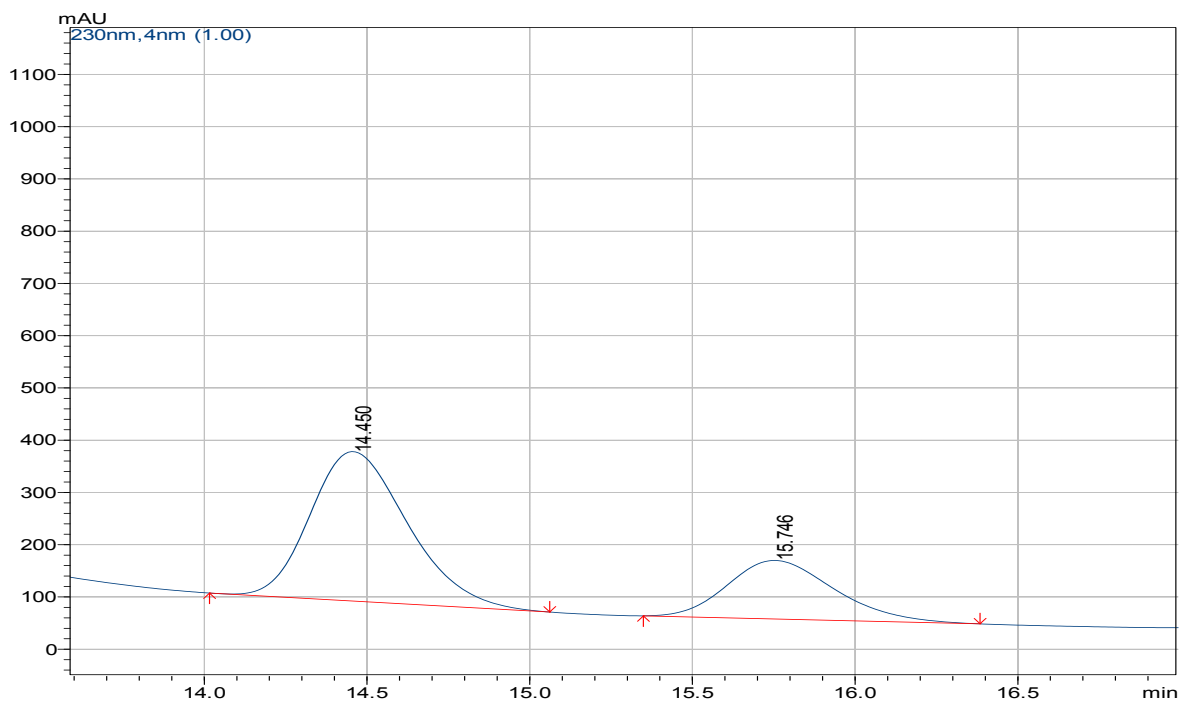

| Peak# | Ret. Time | Area    | Peak Start | Peak End | Area%   |
|-------|-----------|---------|------------|----------|---------|
| 1     | 14.450    | 5940613 | 14.016     | 15.061   | 68.9479 |
| 2     | 15.746    | 2552294 | 15.349     | 16.384   | 31.0521 |

(2*S*,3*S*)-3-(Phenylamino)butan-2-ol [7'a] <sup>[1,3]</sup>:

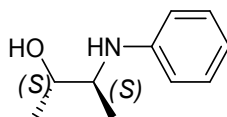

The title compound was isolated by column chromatography (hexane/AcOEt 90/10) as oil; The *ee* 62% on HPLC (Chiralpak OD column,) mobile phase, 97/2 hexane/*i*-PrOH; flow rate 0.8 mL/min., retention time (2*S*,3*S*): 32.25 min., (2*R*,3*R*): 35.40 min.; <sup>1</sup>H NMR (200 MHz, CDCl<sub>3</sub>, δ ppm): δ = 7.25 (t, *J* = 7.5 Hz, 2 H), 6.81 (t, *J* = 7.5 Hz, 1 H), 6.74 (d, *J* = 3.2 Hz, 2 H), 3.68 (m, 1 H), 3.37 (m, 1 H), 2.84 (bs, 2 H), 1.32 (d, *J* = 2.6 Hz, 1 H) 1.22 (d, *J* = 2.6 Hz, 1 H); <sup>13</sup>C NMR



(200 MHz, CDCl<sub>3</sub>,  $\delta$  ppm):  $\delta$  = 147.77, 129.38, 118.29, 114.35, 71.42, 56.15, 19.56, 17.33; FTIR (KBr):  $\nu$  = 3397, 3055, 2975, 2925, 1924, 1603, 1502, 1438, 1376, 1318, 1256, 1007, 903, 752, 699 cm<sup>-1</sup>; TOF-MS (ESI+): m/z 166 [M+H]<sup>+</sup>.

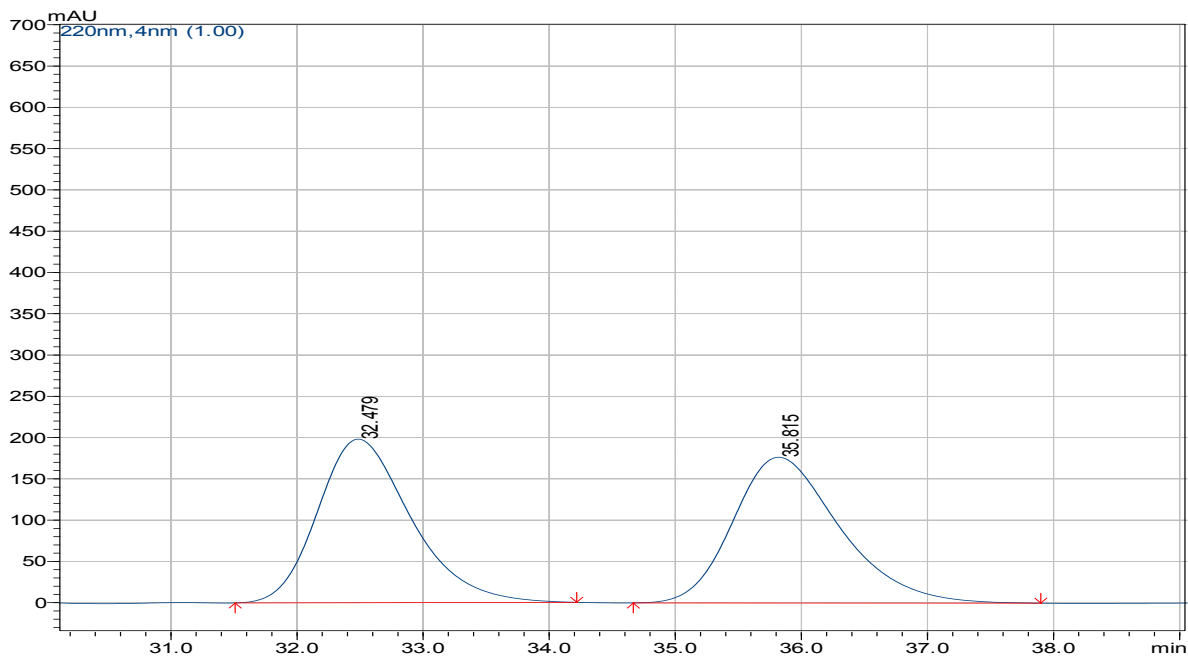

| Peak# | Ret. Time | Area     | Peak Start | Peak End | Area%   |
|-------|-----------|----------|------------|----------|---------|
| 1     | 32.479    | 10202178 | 31.509     | 34.219   | 49.4997 |
| 2     | 35.815    | 10408411 | 34.667     | 37.899   | 50.5003 |

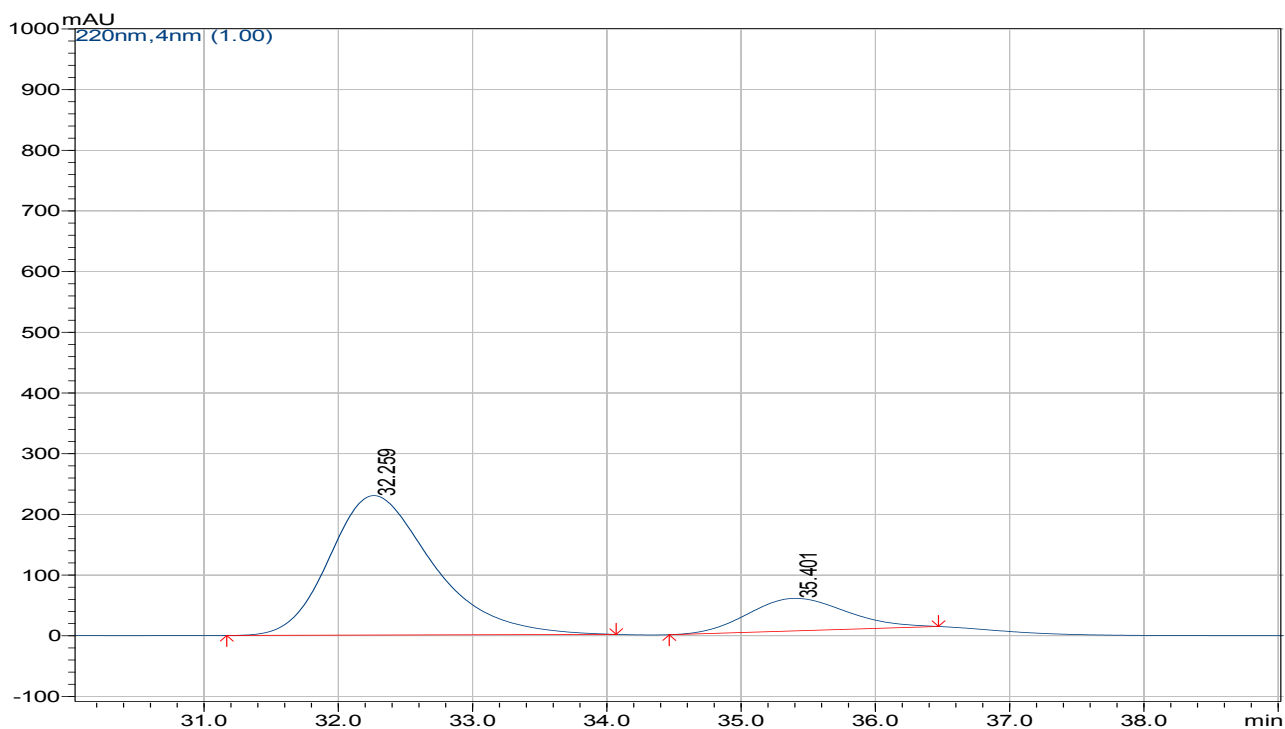

| Peak# | Ret. Time | Area     | Peak Start | Peak End | Area%   |
|-------|-----------|----------|------------|----------|---------|
| 1     | 32.259    | 12324422 | 31.168     | 34.069   | 80.9234 |
| 2     | 35.401    | 2719420  | 34.464     | 36.469   | 19.0766 |

**(2*S*,3*S*)-3-(4-Methylphenylamino)butan-2-ol [7'b] <sup>[1,3]</sup>:**

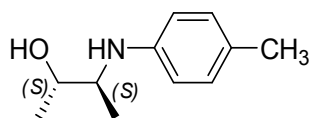

The title compound was isolated by column chromatography (hexane/AcOEt, 90:10) as an oil; The *ee* 99% on HPLC (Chiralpak OD column) mobile phase, 90:10 hexane/PrOH; flow rate 1 mL/min, retention time (2*S*,3*S*): 9.31 min., (2*R*,3*R*): 12.27 min.; <sup>1</sup>H NMR (200 MHz, CDCl<sub>3</sub>, δ ppm): δ = 6.99 (d, *J* = 8.2 Hz, 2 H), 6.60 (d, *J* = 8.2 Hz, 2 H), 3.54-3.67 (m, 1 H), 3.21-3.34 (m, 1 H), 2.88 (bs, 2 H), 2.26 (s, 3 H), 1.25 (d, *J* = 6.0 Hz, 3 H), 1.12 (d, *J* = 6.0 Hz, 3 H); <sup>13</sup>C NMR

(200 MHz, CDCl<sub>3</sub>,  $\delta$  ppm):  $\delta$ = 145.37, 129.85, 127.71, 114.73, 71.36, 56.78, 20.40, 19.46, 17.20; FTIR (KBr):  $\nu$  = 3288, 2955, 1620, 1523, 1445, 1354, 1236, 1157, 1037, 823, 791 cm<sup>-1</sup>; TOF-MS (ESI+):  $m/z$  180 [M+H]<sup>+</sup>.

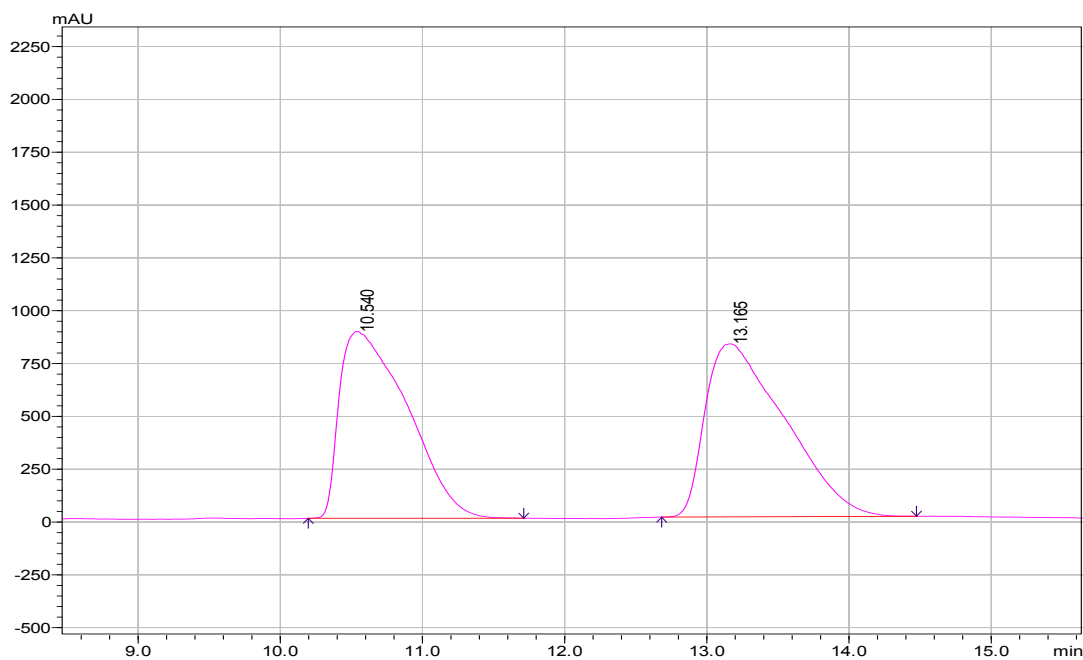

| Peak | Ret. Time | Area     | Peak Start | Peak End | Area%   |
|------|-----------|----------|------------|----------|---------|
| 1    | 10.540    | 29287430 | 10.197     | 11.712   | 47.9435 |
| 2    | 13.165    | 31799900 | 12.683     | 14.475   | 52.0565 |

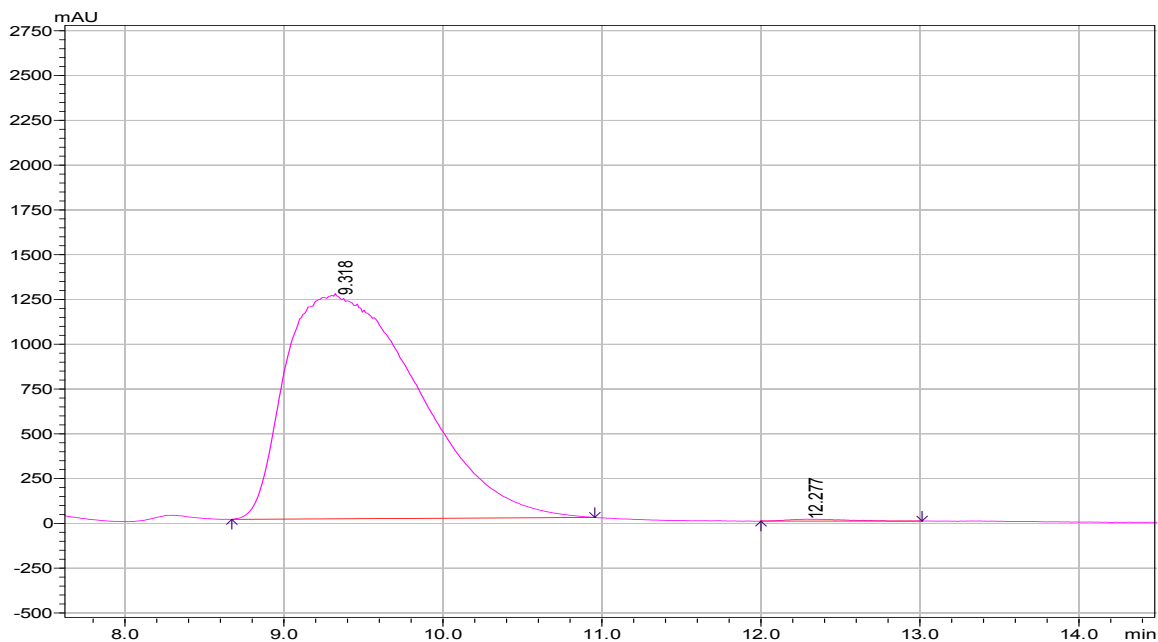

| Peak | Ret. Time | Area     | Peak Start | Peak End | Area%   |
|------|-----------|----------|------------|----------|---------|
| 1    | 9.318     | 72819545 | 8.672      | 10.955   | 99.6441 |
| 2    | 12.277    | 260120   | 12.000     | 13.013   | 0.3559  |

**(2*S*,3*S*)-3-(4-ethylphenylamino)butan-2-ol [7'c] <sup>[1,3]</sup>:**

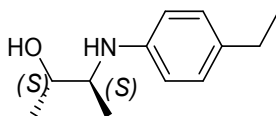

The title compound was isolated by column chromatography (hexane/AcOEt, 90:10) as an oil; The *ee* 90% on HPLC (Chiralpak OD column) mobile phase, 90:10 hexane/<sup>i</sup>PrOH; flow rate 1 mL/min., retention time (2*S*,3*S*): 8.14 min., (2*R*,3*R*): 9.57 min.; <sup>1</sup>H NMR (500 MHz, CDCl<sub>3</sub>, δ ppm): δ = 6.93–6.87 (d, *J* = 8.0 Hz, 2 H), 6.52–6.48 (d, *J* = 8.0 Hz, 2 H), 3.48–3.45 (m, 1 H), 3.19–3.12 (m, 3 H), 2.49–2.37 (q, 2 H), 1.43–1.09 (m, 6 H), 1.05–0.99 (d, *J* = 6.0 Hz, 3 H).; <sup>13</sup>C NMR (200 MHz, CDCl<sub>3</sub>, δ ppm): δ = 145.68, 134.35, 128.65, 114.72, 74.48, 60.58, 33.13,

31.64, 27.99, 25.08, 24.3, 15.9; FTIR (KBr):  $\nu = 3288, 2956, 1620, 1523, 1445, 1354, 1236, 1158, 1037, 822, 791 \text{ cm}^{-1}$ ; TOF-MS (ESI+):  $m/z$  194  $[M+H]^+$ .

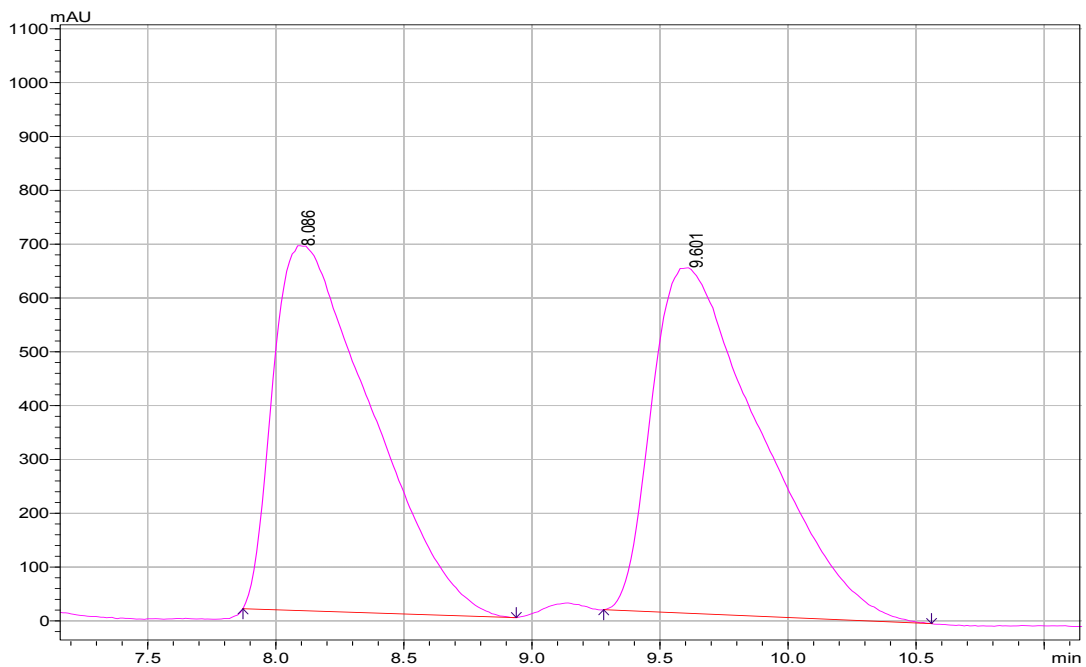

| Peak | Ret. Time | Area     | Peak Start | Peak End | Area%   |
|------|-----------|----------|------------|----------|---------|
| 1    | 8.086     | 18159147 | 7.872      | 8.939    | 48.9799 |
| 2    | 9.601     | 18915538 | 9.280      | 10.560   | 51.0201 |

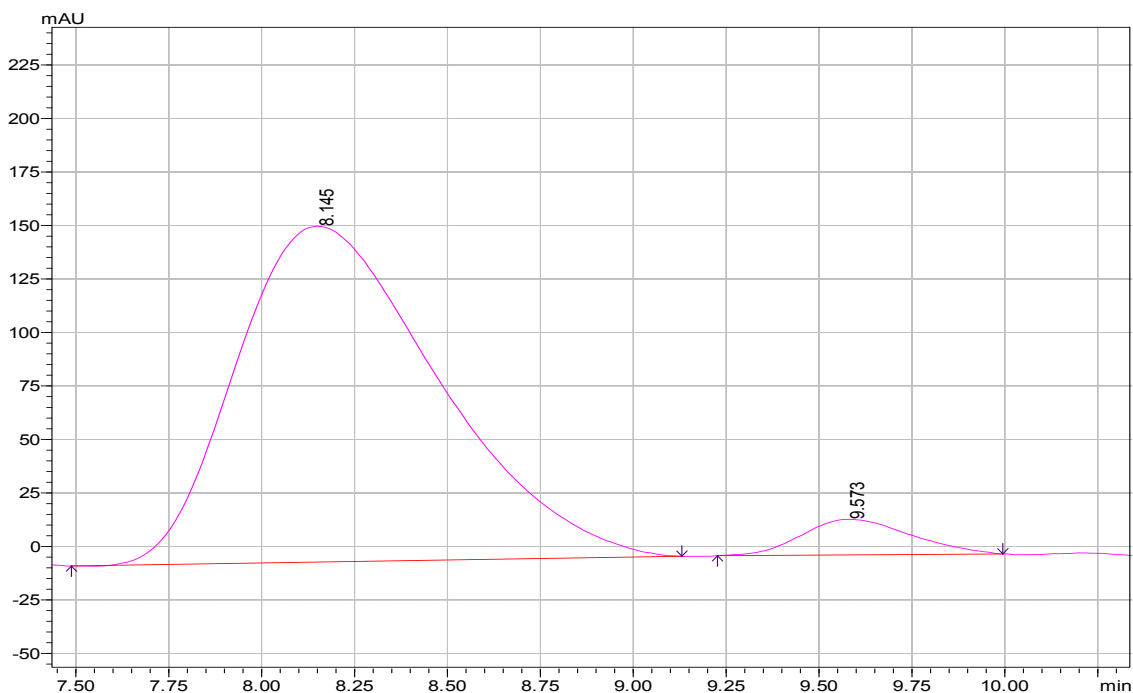

| Peak | Ret. Time | Area    | Peak Start | Peak End | Area%   |
|------|-----------|---------|------------|----------|---------|
| 1    | 8.145     | 5927431 | 7.488      | 9.131    | 94.6034 |
| 2    | 9.573     | 338129  | 9.227      | 9.995    | 5.3966  |

**(2*S*,3*S*)-3-(2-chlorophenylamino)butan-2-ol [7'd] <sup>[1,3]</sup>:**

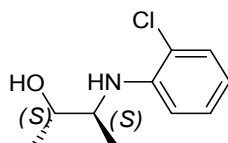

The title compound was isolated by column chromatography (hexane/AcOEt, 90:10) as an oil; The *ee* 86% on HPLC (Chiralpak OD column) mobile phase, 97:3 hexane/*i*PrOH; flow rate 0.8 mL/min., retention time (2*S*,3*S*): 15.21 min., (2*R*,3*R*): 17.78 min.; <sup>1</sup>HNMR (200 MHz, CDCl<sub>3</sub>, δ ppm): δ= 7.25–7.29 (m, 1 H), 7.11–7.14 (m, 1 H), 6.76 (d, *J* = 8.0 Hz, 1 H), 6.66–6.70 (m, 1 H), 4.23 (bs, 1 H), 3.41 (m, 1 H), 2.48 (bs, 1 H), 1.22 (d, *J* = 6.2 Hz, 3 H), 1.18 (d, *J* = 6.2 Hz, 3 H);

$^{13}\text{C}$  NMR (200 MHz,  $\text{CDCl}_3$ ,  $\delta$  ppm):  $\delta$  = 143.88, 129.53, 127.81, 120.33, 118.01, 112.80, 71.34, 55.66, 19.70, 17.55; FTIR (KBr):  $\nu$  = 3287, 2955, 1620, 1522, 1445, 1354, 1236, 1159, 1037, 823, 791; TOF-MS (ESI+):  $m/z$  180  $[\text{M-OH}]^+$ .

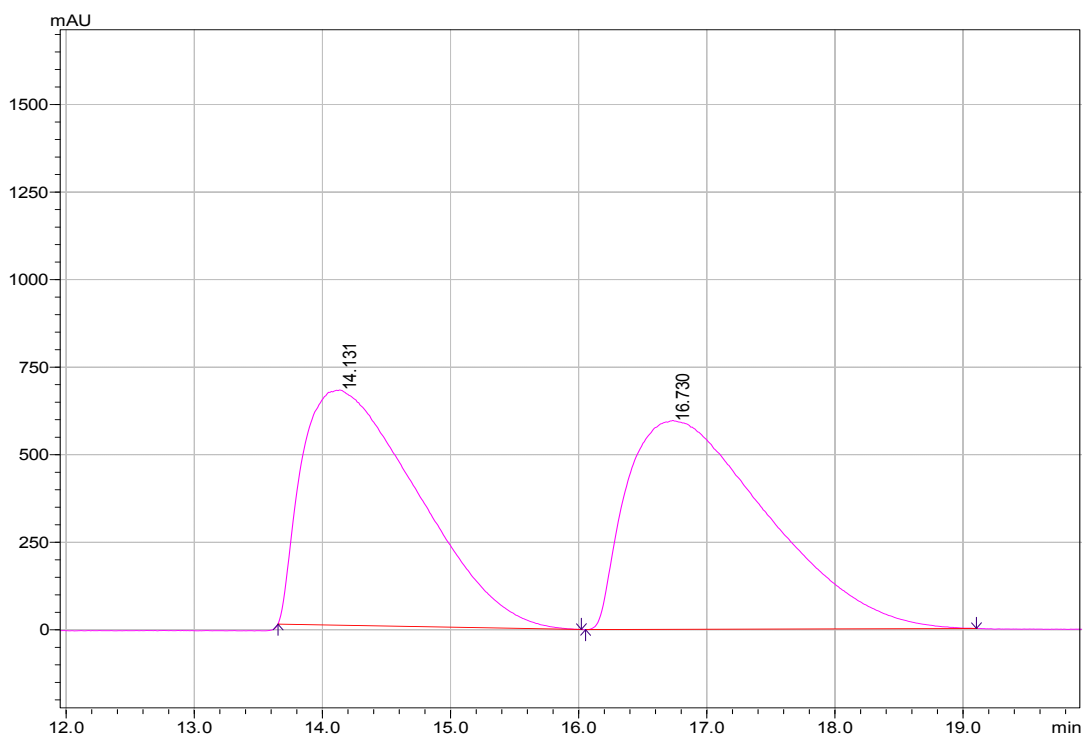

| Peak | Ret. Time | Area     | Peak Start | Peak End | Area%   |
|------|-----------|----------|------------|----------|---------|
| 1    | 14.131    | 42181163 | 13.653     | 16.021   | 48.0827 |
| 2    | 16.730    | 45545177 | 16.053     | 19.104   | 51.9173 |

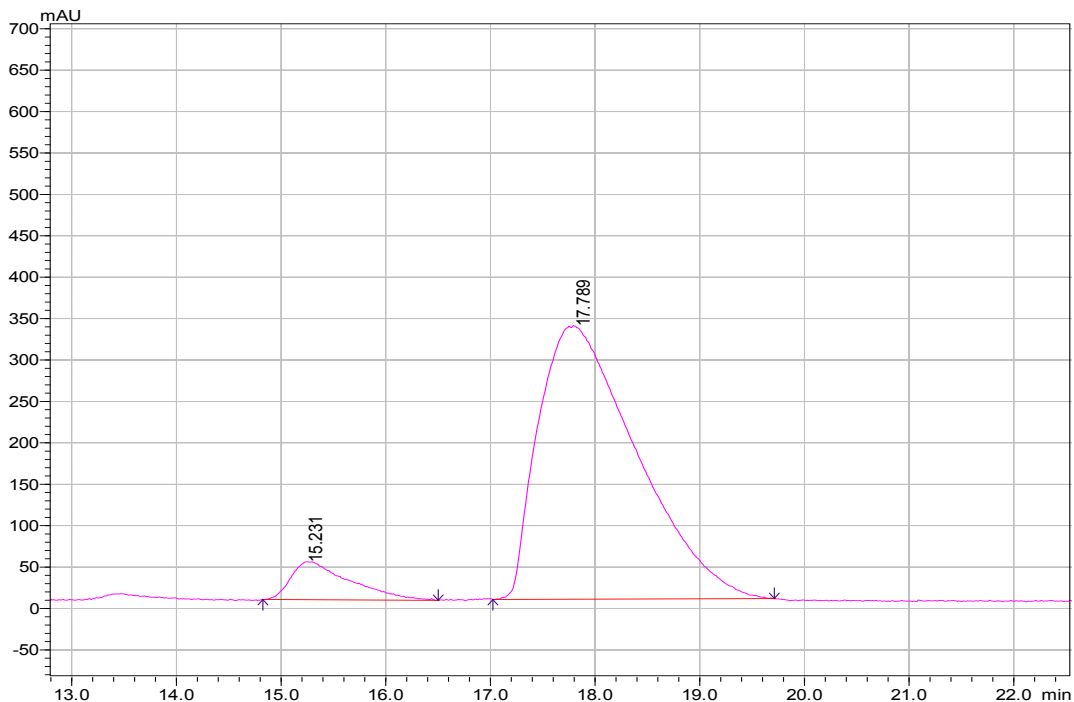

| Peak | Ret. Time | Area     | Peak Start | Peak End | Area%   |
|------|-----------|----------|------------|----------|---------|
| 1    | 15.231    | 1790065  | 14.827     | 16.501   | 7.6794  |
| 2    | 17.789    | 21519903 | 17.024     | 19.712   | 92.3206 |

**(1*S*,2*S*)-2-(phenylamino)-cyclohexene-1-ol [8'a] <sup>[1,3]</sup>:**

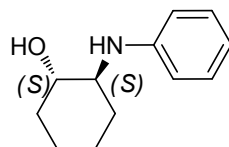

The title compound was isolated by column chromatography (hexane/AcOEt 90/10) as a white solid; Melting point: 58–60°C; The *ee* 63% on HPLC (Chiralpak OD column) mobile phase, 96/4 hexane/*i*-PrOH; flow rate 0.7 mL/min., retention time. (*1S,2S*): 23.24 min., (*1R,2R*): 27.51 min.; <sup>1</sup>H NMR (200 MHz, CDCl<sub>3</sub>, δ ppm): δ= 7.09 (t, *J*= 3 Hz, 2H), 6.64–6.69 (m, 3 H), 3.26 (m, 1 H), 3.08 (m, 1 H), 2.66 (bs, 1 H), 2.03–2.06 (m, 2 H), 1.70–1.71 (m, 1 H), 1.64–1.66 (m, 1 H),



1.51(bs, 1H), 1.29–1.37 (m, 1 H), 1.18–1.26 (m, 1 H);  $^{13}\text{C}$  NMR (200 MHz,  $\text{CDCl}_3$ ,  $\delta$  ppm):  $\delta$ = 147.82, 129.35, 118.41, 114.40, 74.58, 60.18, 33.12, 31.53, 25.04, 24.27; FTIR (KBr):  $\nu$  = 3356, 2933, 2858, 1602, 1501, 1448, 1320, 1067, 748  $\text{cm}^{-1}$ ; TOF-MS (ESI+):  $m/z$  192  $[\text{M}+\text{H}]^+$ ,

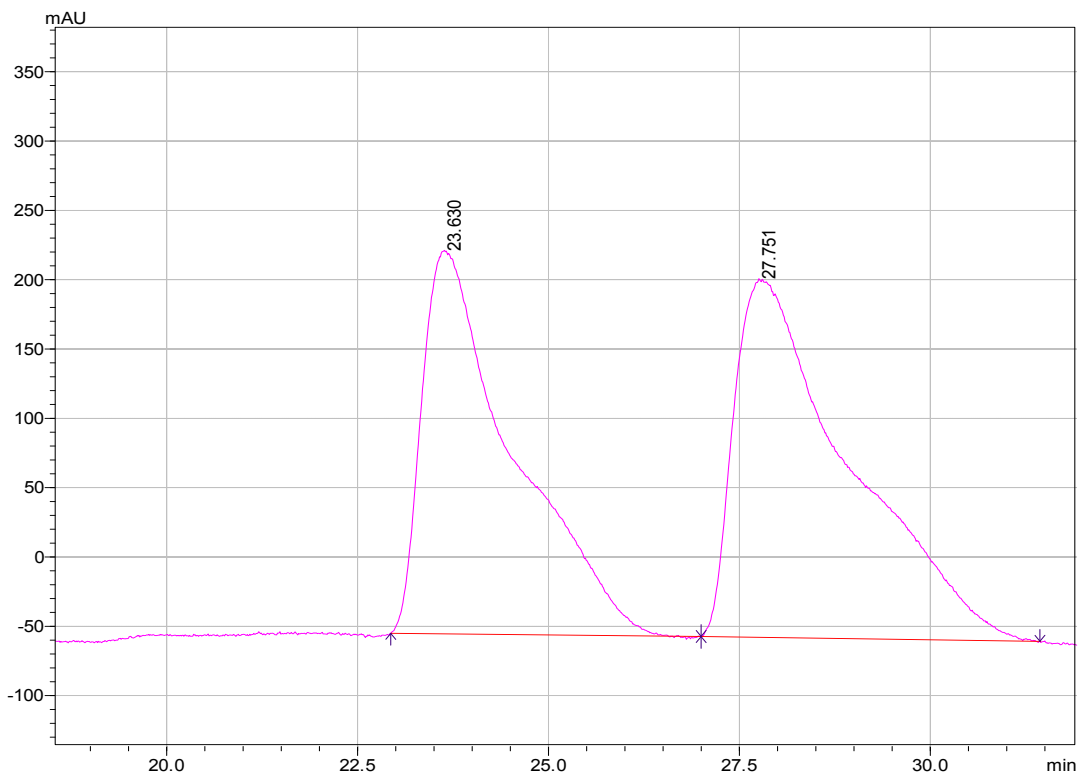

| Peak | Ret. Time | Area     | Peak Start | Peak End | Area%   |
|------|-----------|----------|------------|----------|---------|
| 1    | 23.630    | 22847919 | 22.933     | 26.997   | 45.8611 |
| 2    | 27.751    | 26971872 | 26.997     | 31.435   | 54.1389 |

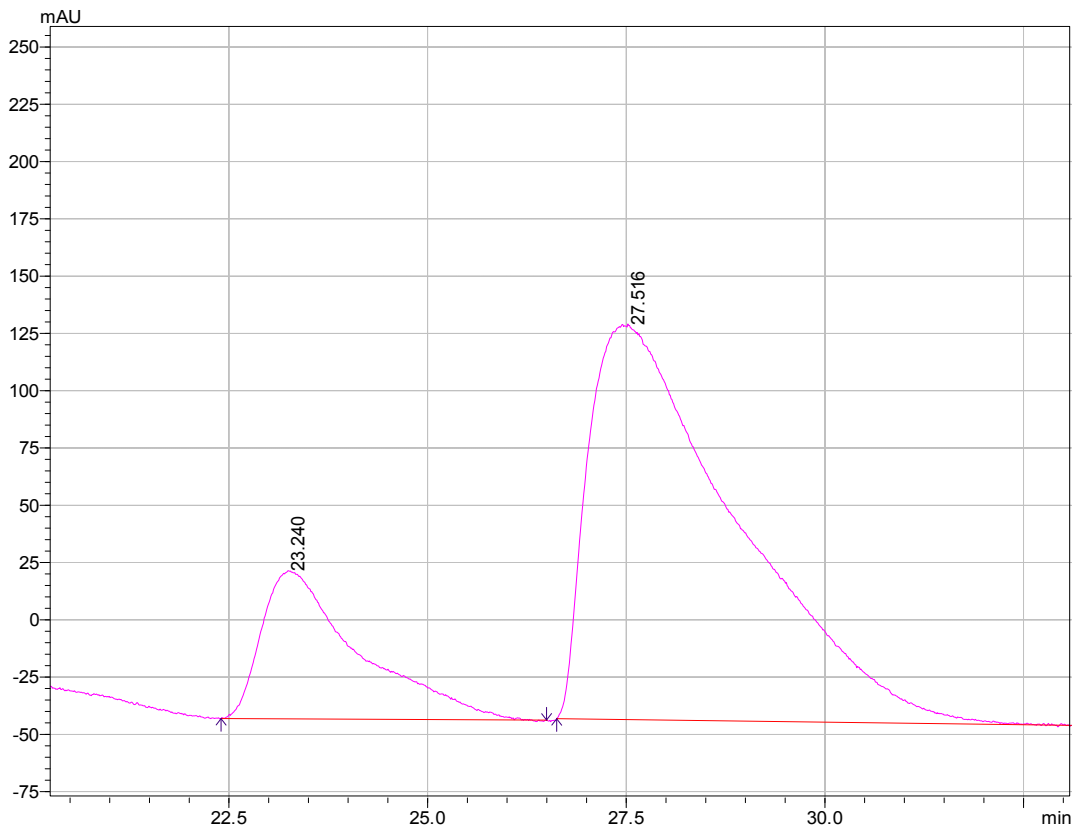

| Peak | Ret. Time | Area     | Peak Start | Peak End | Area%   |
|------|-----------|----------|------------|----------|---------|
| 1    | 23.240    | 5488248  | 22.400     | 26.496   | 18.7122 |
| 2    | 27.516    | 22353666 | 26.624     | 34.091   | 81.2878 |

**(1*S*,2*S*)-2-(4-Methylphenylamino)-cyclohexane-1-ol [8'*b*]** <sup>[1,3]</sup>:

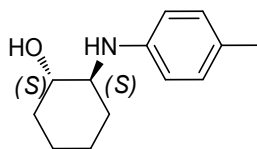

The title compound was isolated by column chromatography (hexane/AcOEt 90/10) as a brownish liquid; The ee 85 % on HPLC (Chiralpak OD column) mobile phase, 90/10 hexane/ *i*-PrOH: flow rate 0.8 mL/min., retention time (1*S*,2*S*): 11.17 min. (1*R*,2*R*):17.4 min.; <sup>1</sup>H NMR

(200 MHz, CDCl<sub>3</sub>,  $\delta$  ppm):  $\delta$  = 7.0 (d,  $J$  = 3.2 Hz, 2 H), 6.65 (d,  $J$  = 3.2 Hz, 2 H), 3.33-3.37 (m, 1 H), 3.08-3.12 (m, 1 H), 2.48 (bs, 2 H), 2.26 (s, 3 H), 2.12–2.13 (m, 2 H), 1.78–1.79 (m, 1 H), 1.72–1.73 (m, 1 H), 1.27-1.42 (m, 3 H), 1.01-1.06 (m, 1 H); <sup>13</sup>C NMR (200 MHz, CDCl<sub>3</sub>,  $\delta$  ppm):  $\delta$  = 145.41, 129.92, 127.97, 114.94, 74.56, 60.83, 33.20, 31.63, 25.17, 24.38, 20.48; FTIR (KBr):  $\nu$  = 3665, 3390, 3105, 3019, 2928, 2860, 2734, 1866, 1617, 1519, 1451, 1451, 1405, 1300, 1252, 1183, 1129, 1068, 938 cm<sup>-1</sup>; TOF-MS (ESI+):  $m/z$  206 [M+H]<sup>+</sup>.

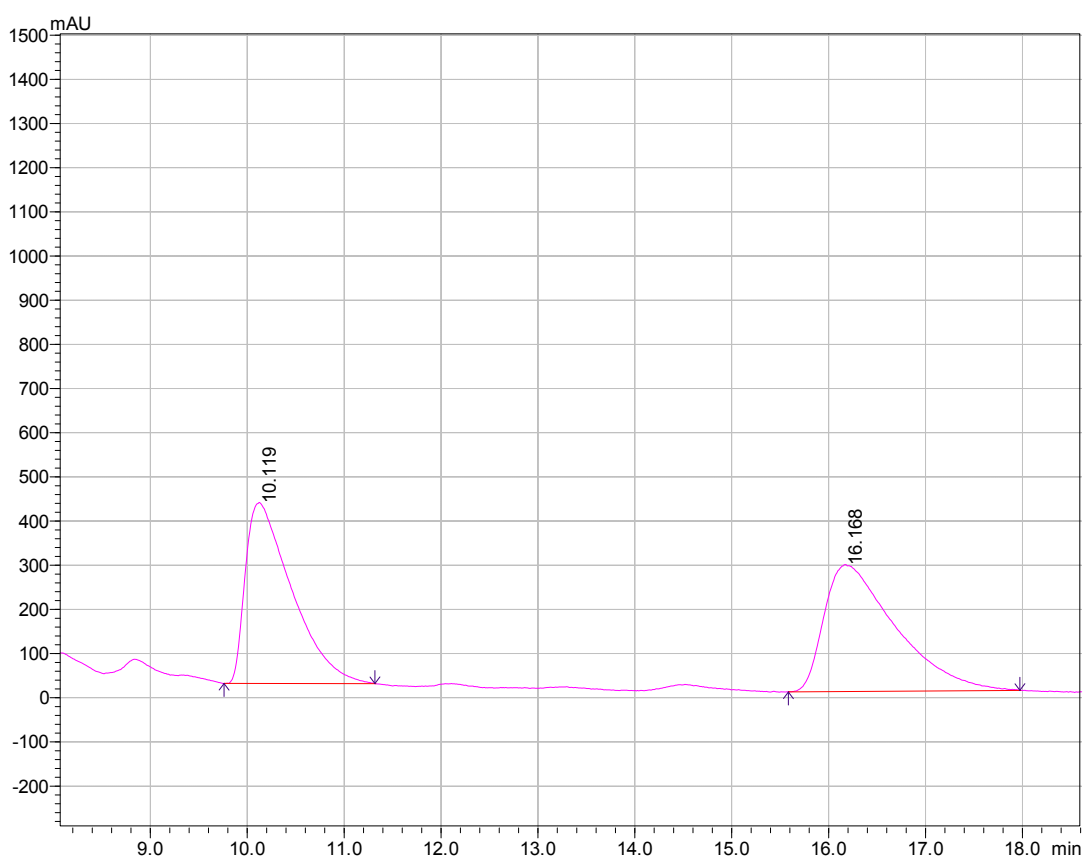

| Peak | Ret. Time | Area     | Peak Start | Peak End | Area%   |
|------|-----------|----------|------------|----------|---------|
| 1    | 10.119    | 13613603 | 9.760      | 11.317   | 48.0981 |
| 2    | 16.168    | 14690215 | 15.584     | 17.973   | 51.9019 |

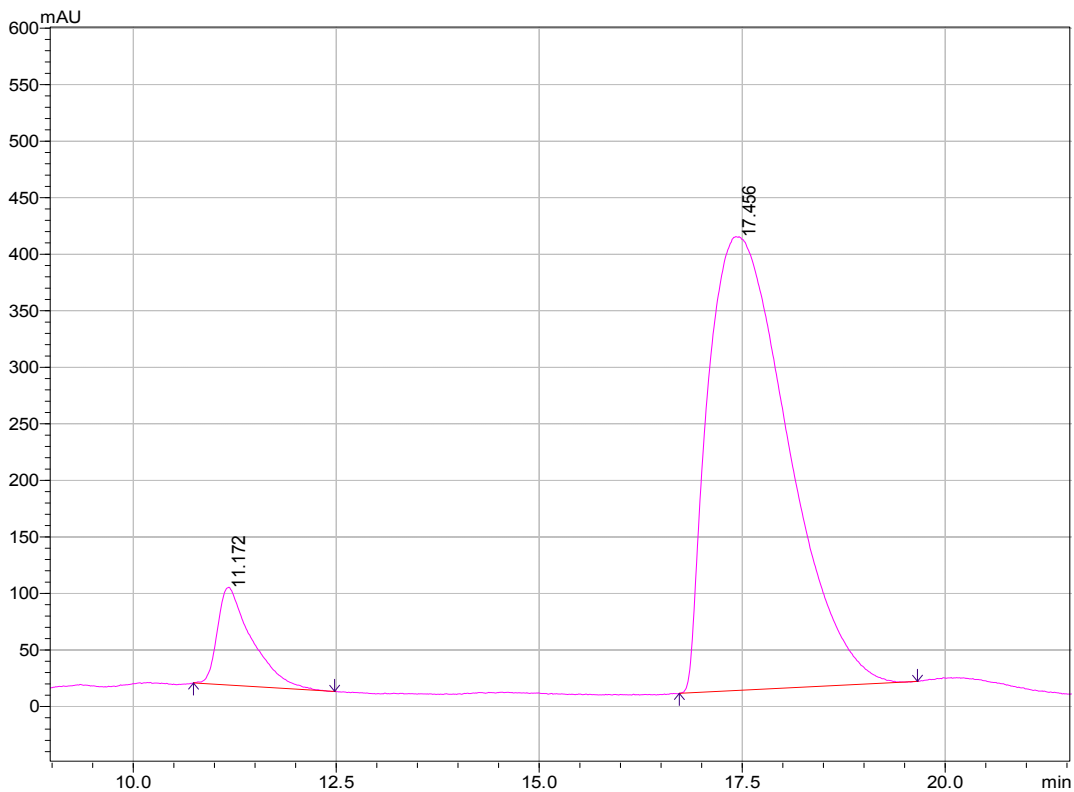

| Peak | Ret. Time | Area     | Peak Start | Peak End | Area%   |
|------|-----------|----------|------------|----------|---------|
| 1    | 11.172    | 2529479  | 10.741     | 12.480   | 7.4515  |
| 2    | 17.456    | 27400027 | 16.725     | 19.659   | 92.5485 |

**(1S,2S)-2-(4-ethylphenylamino)-cyclohexan-1-ol [8'c] <sup>[1,3]</sup>:**

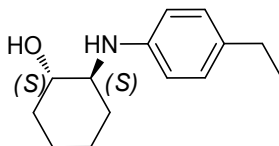

The title compound was isolated by column chromatography (hexane/AcoEt 90/10) as a brownish liquid; The ee 95% on HPLC (Chiralpak OD column) mobile phase, 94/6 hexane/i-PrOH: flow rate 0.8 mL/min., retention time (1S,2S): 13.88 min., (1R,2R): 18.70 min.; <sup>1</sup>H NMR (200 MHz, CDCl<sub>3</sub>, δ ppm ): δ = 7.05 (d, *J* = 8.4 Hz, 2 H), 6.68 (d, *J* = 8.1 Hz, 2 H), 3.37-3.33

(m, 1 H), 3.15-3.05 (m, 3 H), 2.62 (q,  $J = 7.5$  Hz, 2 H), 2.15-2.09 (m, 2 H), 1.78-1.72 (m, 2 H), 1.43-1.28 (m, 3 H), 1.24 (t,  $J = 7.5$  Hz, 3 H), 1.06-0.1.0 (m, 1 H);  $^{13}\text{C}$  NMR ( $\text{CDCl}_3$ , 200 MHz,  $\delta$  ppm):  $\delta = 145.67, 134.34, 128.65, 114.70, 74.47, 60.58, 33.14, 31.62, 29.68, 27.94, 25.07, 24.32, 15.97$ ; FT-IR (KBr)  $\nu = 3393, 2958, 2927, 2855, 1616, 1539, 1517, 1488, 1455, 1418, 1321, 1257, 1068$   $\text{cm}^{-1}$ ; TOF-MS (ESI+):  $m/z$  220  $[\text{M}+\text{H}]^+$

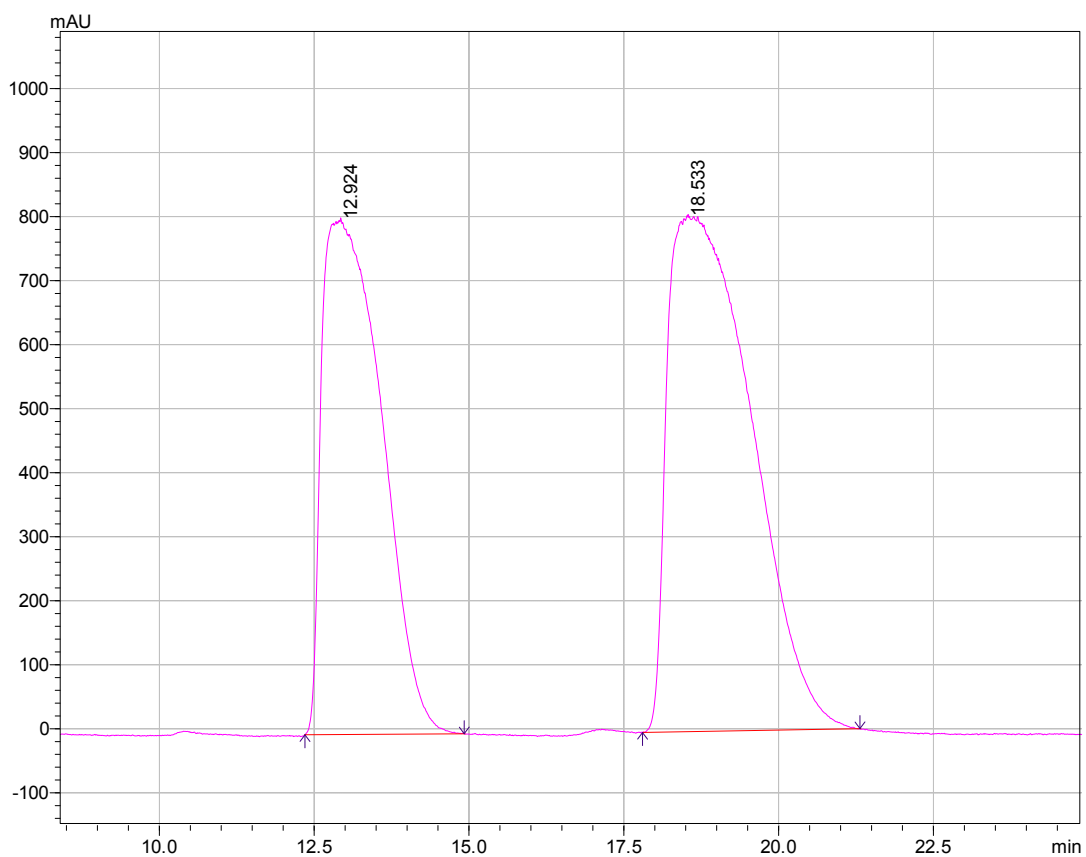

| Peak | Ret. Time | Area     | Peak Start | Peak End | Area%   |
|------|-----------|----------|------------|----------|---------|
| 1    | 12.924    | 64150650 | 12.352     | 14.923   | 45.5743 |
| 2    | 18.533    | 76099519 | 17.803     | 21.312   | 54.4257 |

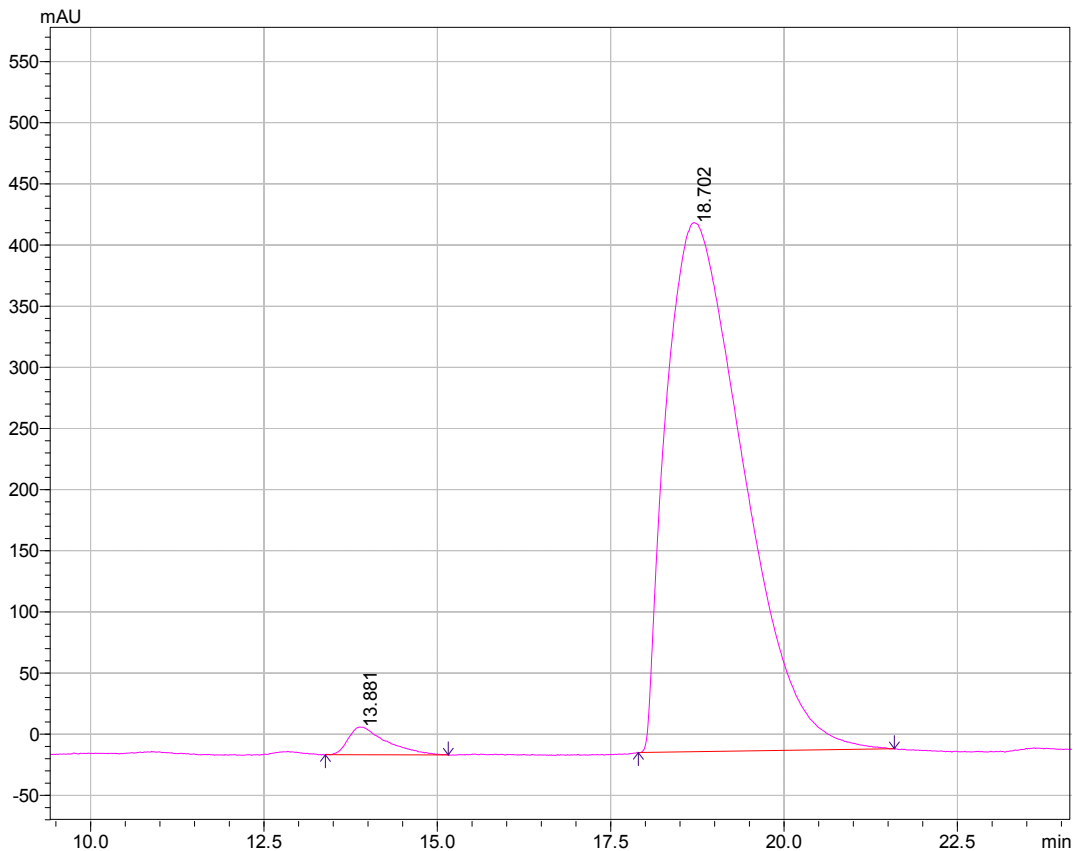

| Peak | Ret. Time | Area     | Peak Start | Peak End | Area%   |
|------|-----------|----------|------------|----------|---------|
| 1    | 13.881    | 860286   | 13.387     | 15.157   | 2.5129  |
| 2    | 18.702    | 33374796 | 17.899     | 21.589   | 97.4871 |

**(1*S*,2*S*)-2-(2-chlorophenylamino)-cyclohexane-1-ol [8'd]** <sup>[1,3]</sup>:

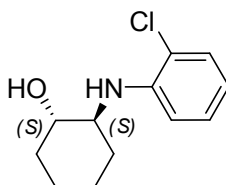

The title compound was isolated by column chromatography (hexane/AcOEt 90/10) as a brownish liquid. The ee 80 % on HPLC (Chiralpak OD column) mobile phase, 90/10 hexane/*i*-PrOH: flow rate 1 ml/min, retention time (1*S*,2*S*):13.66 min, (1*R*,2*R*):14.61 min.; <sup>1</sup>H NMR(200

MHz, CDCl<sub>3</sub>):  $\delta$  = 7.16 (d,  $J$  = 8.0 Hz, 1 H), 7.05 (t,  $J$  = 8.0 Hz, 1 H), 6.74 (d,  $J$  = 8.0 Hz, 1 H), 6.53 (t,  $J$  = 8.0 Hz, 1 H), 3.99 (bs, 1H), 3.31-3.42 (m, 1 H), 3.05-3.17 (m, 1 H), 2.73 (bs, 1H), 1.97-2.03 (m, 2H), 1.63–1.71 (m, 2 H), 0.82–1.43 (m, 6 H): <sup>13</sup>C NMR (200 MHz, CDCl<sub>3</sub>):  $\delta$  = 153.83, 143.84, 129.32, 127.84, 120.20, 117.98, 112.83, 111.60, 74.46, 59.75, 33.21, 31.67, 24.92, 24.21, 20.38: FTIR(KBr):  $\nu$  = 3370, 3005, 2956, 2845, 2774, 1866, 1619, 1524, 1467, 1451, 1402, 1252, 1182, 1126, 1054, 930 cm<sup>-1</sup>; TOF-MS (ESI+): m/z 226 [M+H]<sup>+</sup>.

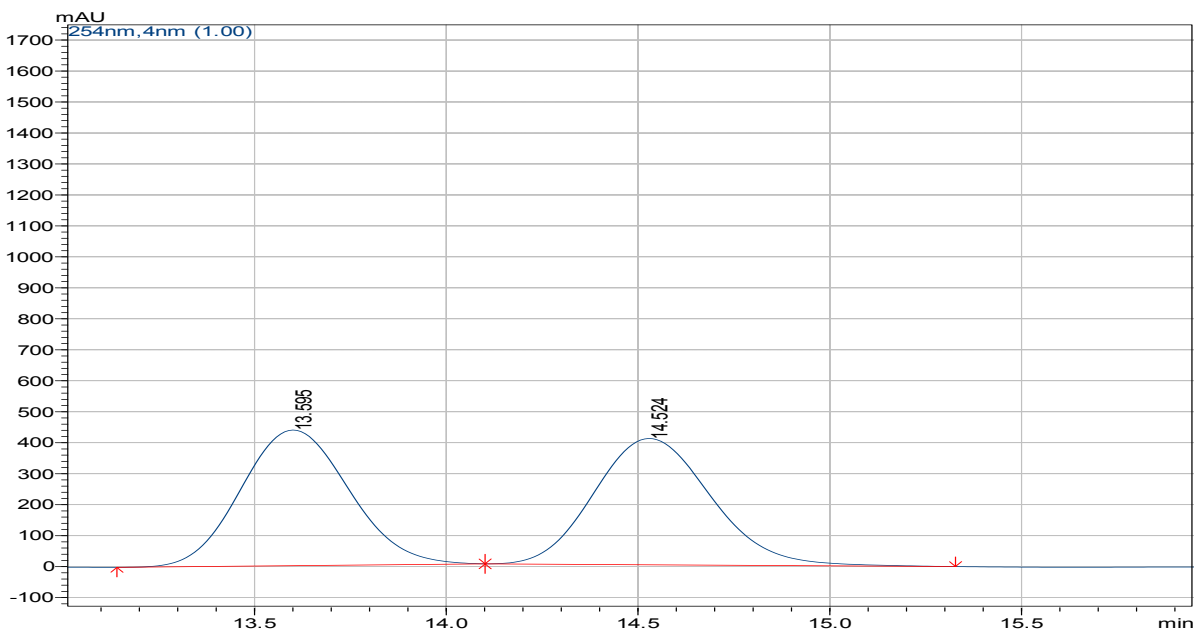

| Peak# | Ret. Time | Area    | Peak Start | Peak End | Area%   |
|-------|-----------|---------|------------|----------|---------|
| 1     | 13.595    | 8587514 | 13.141     | 14.101   | 49.8409 |
| 2     | 14.524    | 8642334 | 14.101     | 15.328   | 50.1591 |

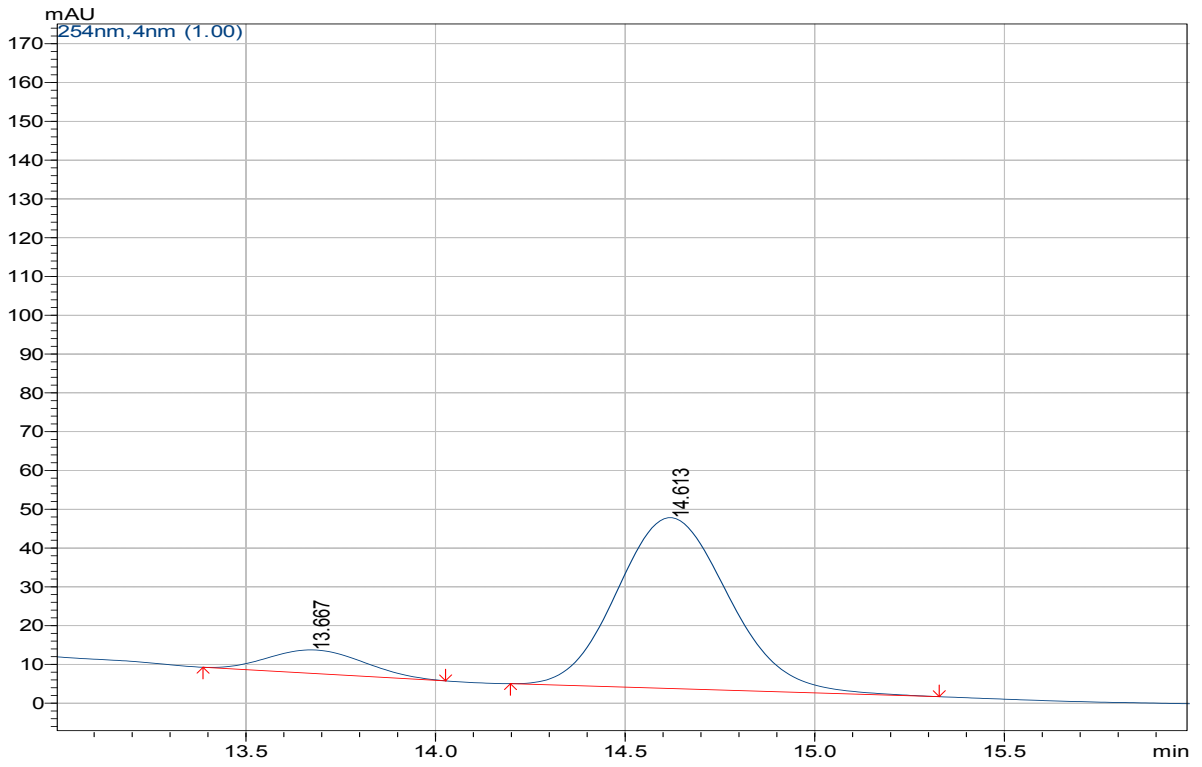

| Peak# | Ret. Time | Area   | Peak Start | Peak End | Area%   |
|-------|-----------|--------|------------|----------|---------|
| 1     | 13.667    | 104866 | 13.387     | 14.027   | 10.0996 |
| 2     | 14.613    | 903496 | 14.197     | 15.328   | 89.9004 |



## 5. $^1\text{H}$ and $^{13}\text{C}$ NMR spectra of Products :

### (1*S*,2*S*)-1,2-Diphenyl-2-(phenylamino)-ethanol [6'a]

#### $^1\text{H}$ NMR

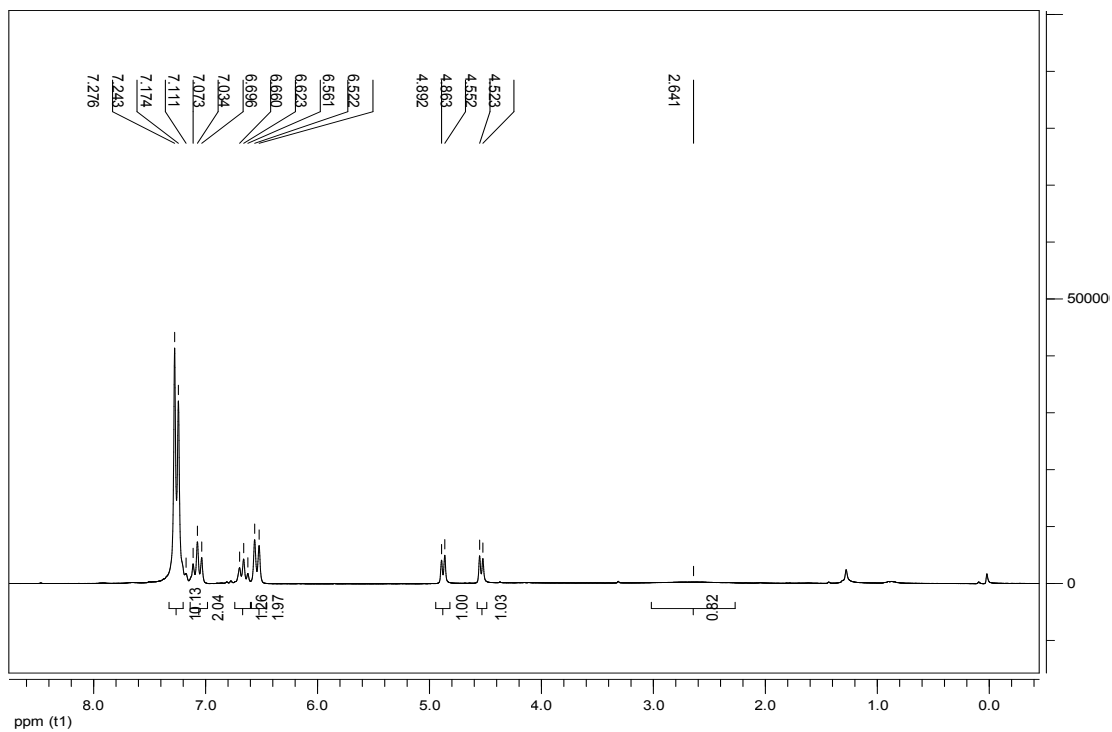

#### $^{13}\text{C}$ NMR

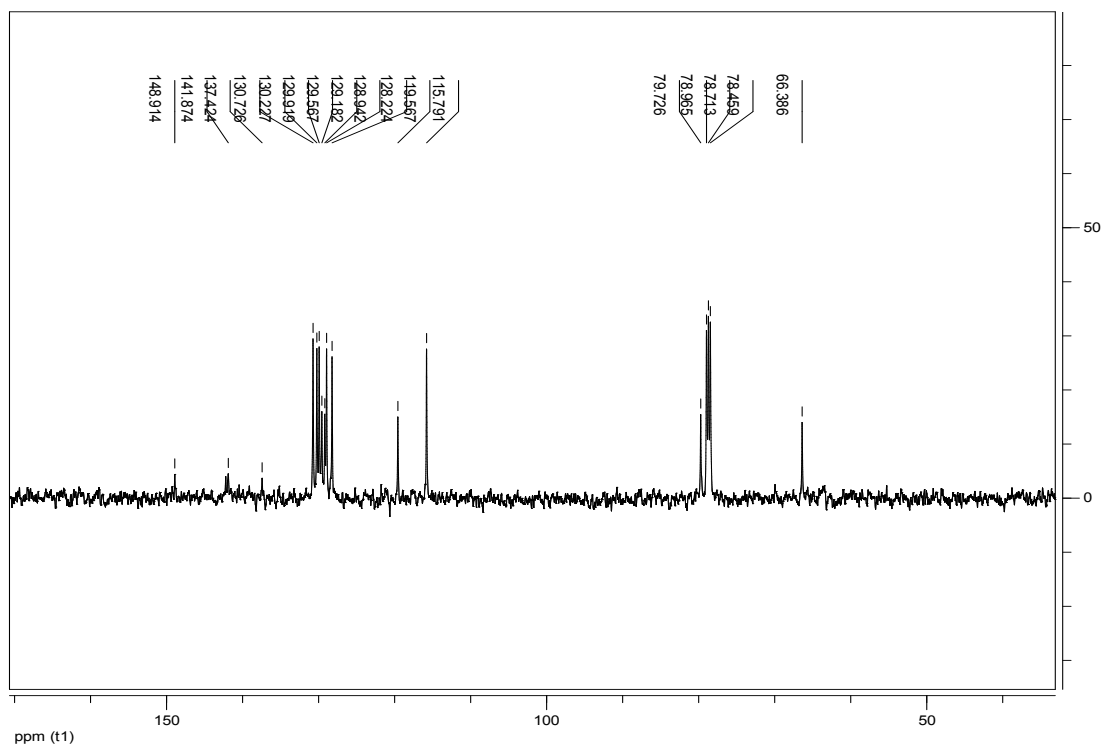

**(1*S*,2*S*)-1,2-Diphenyl-2-(4-methyl-phenylamino)-ethanol [6'b]**

**<sup>1</sup>H NMR**

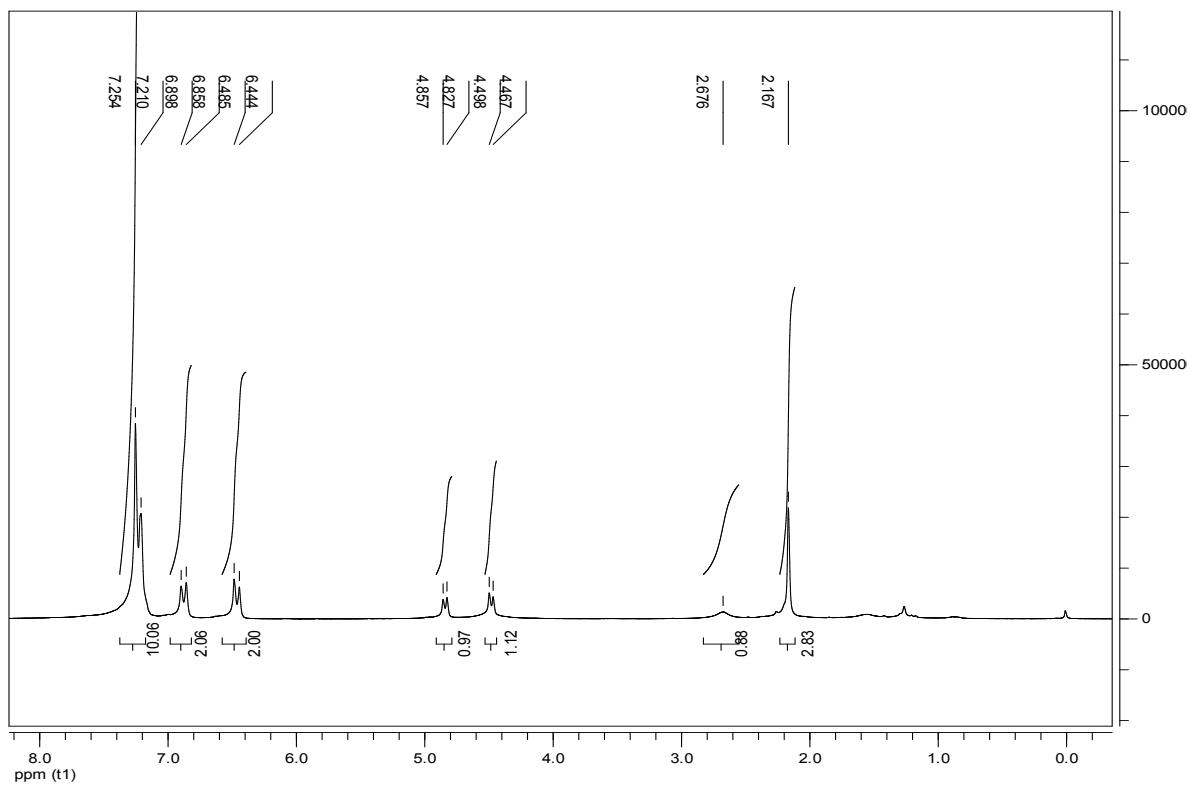

**<sup>13</sup>C NMR**

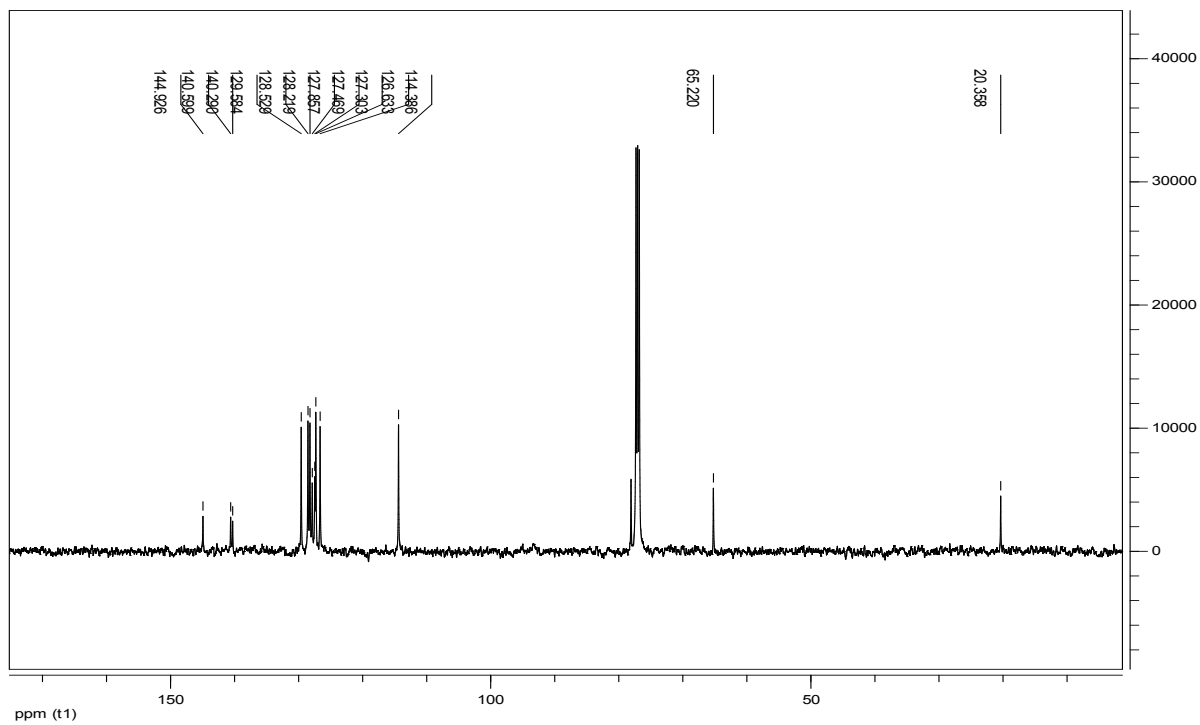

**(1*S*,2*S*)-1,2-diphenyl-2-(4-ethyl-phenylamino)-ethanol [6'c]**

**<sup>1</sup>H NMR**

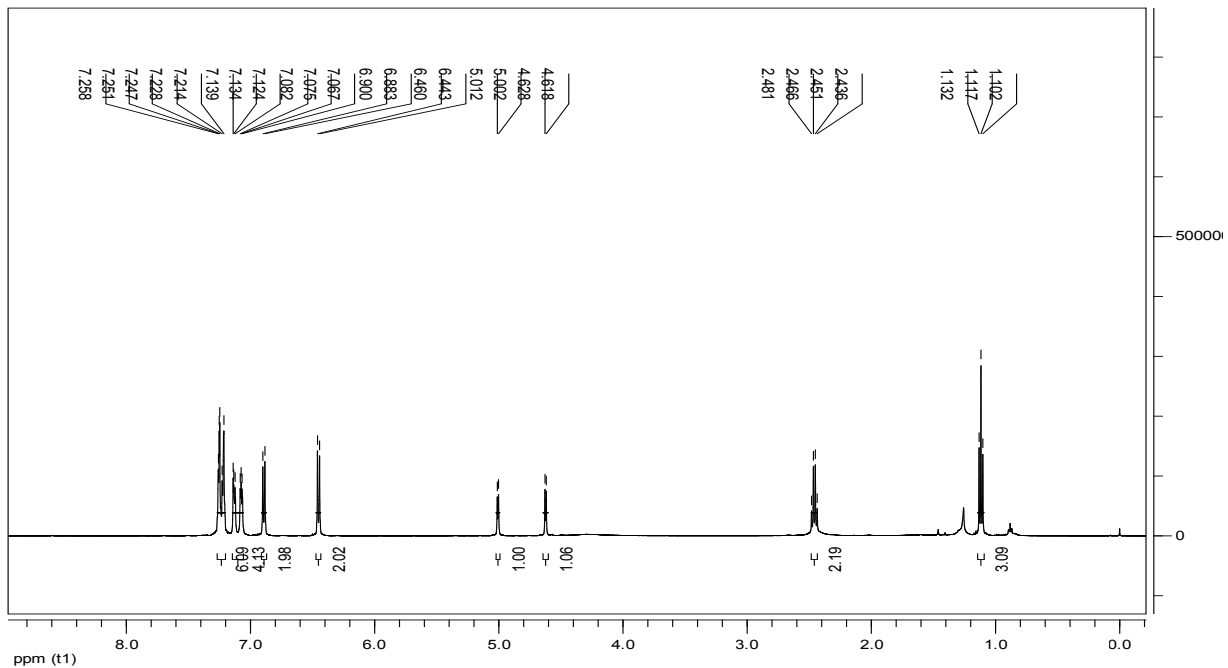

**<sup>13</sup>C NMR**

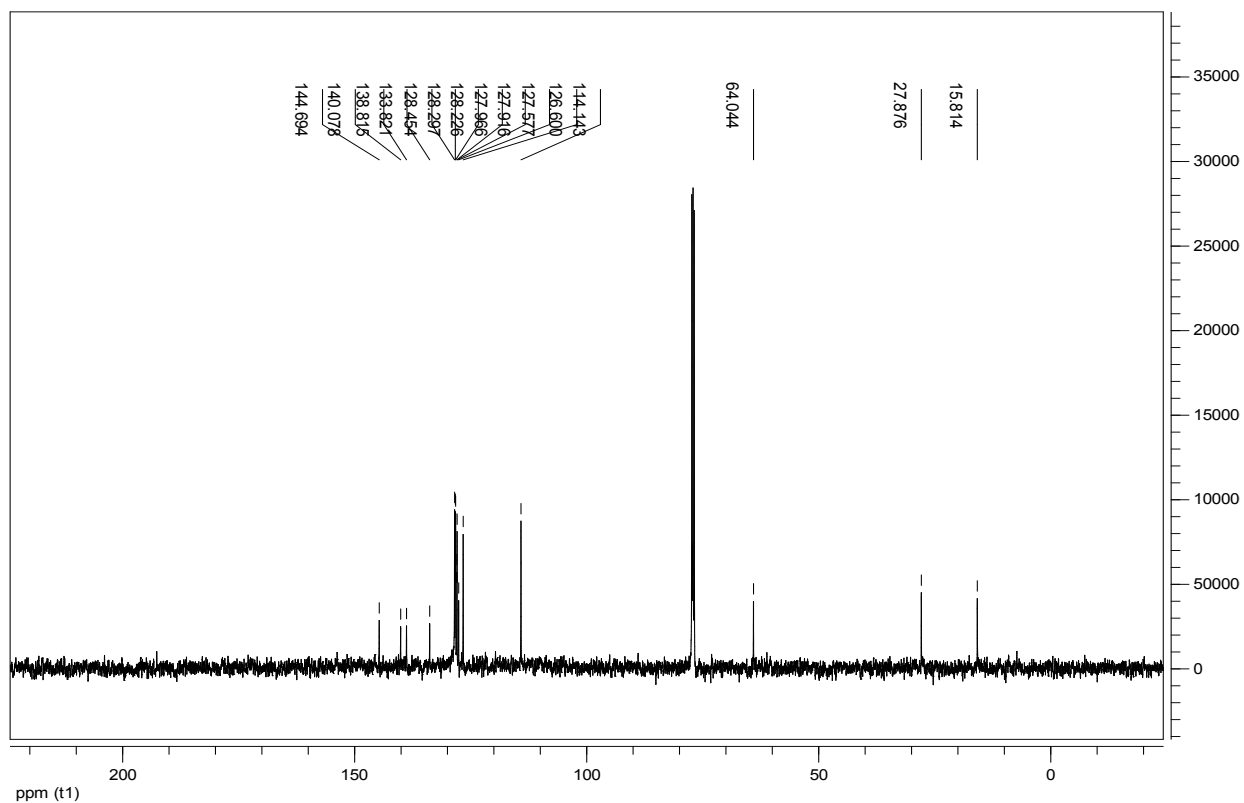

**(1*S*,2*S*)-1,2-Diphenyl-2-(4-methoxy-phenylamino)-ethanol [6'd]**

**<sup>1</sup>H NMR**

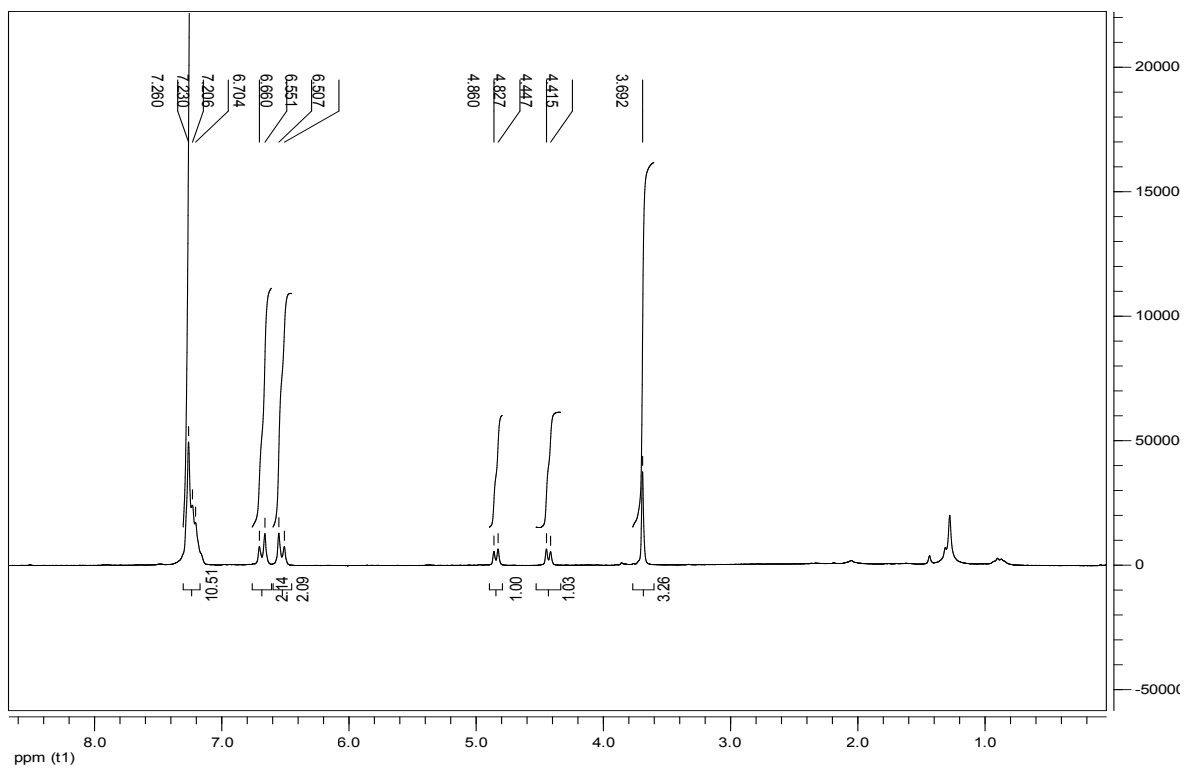

**<sup>13</sup>C NMR**

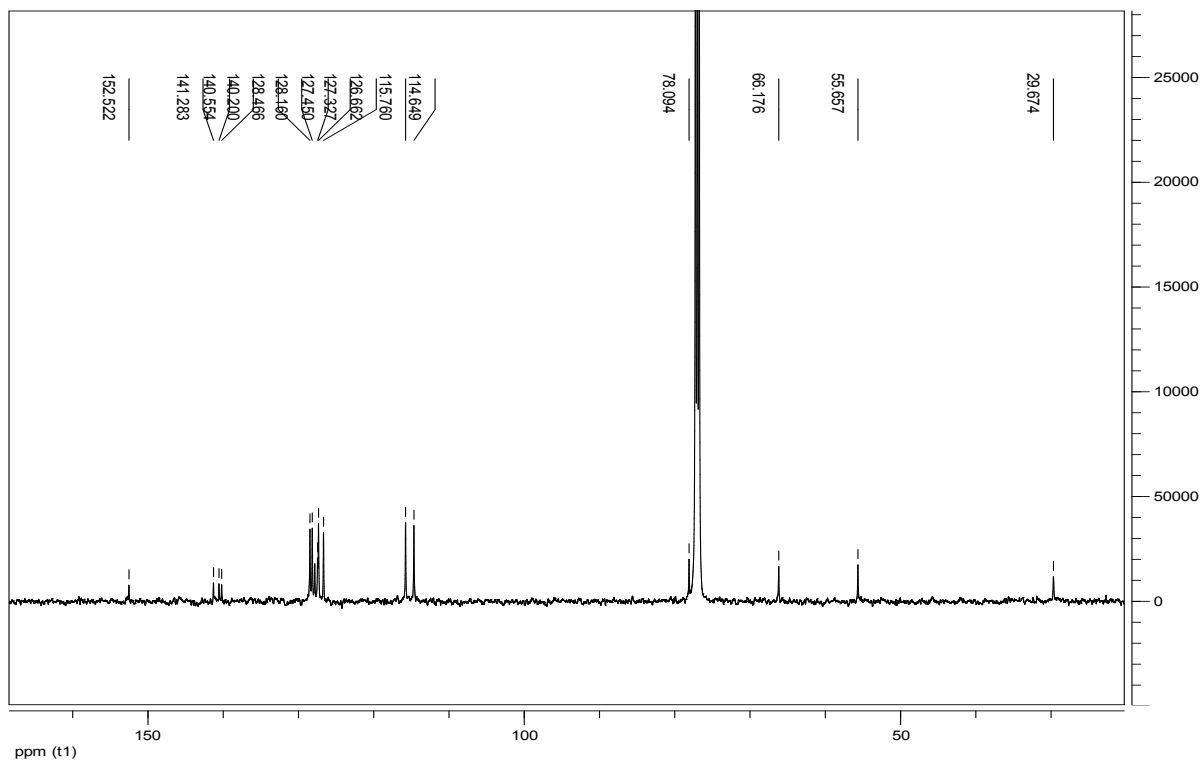

**(1*S*,2*S*)-1,2-Diphenyl-2-(2-methoxy-phenylamino)-ethanol [6'e]**

**<sup>1</sup>H NMR**

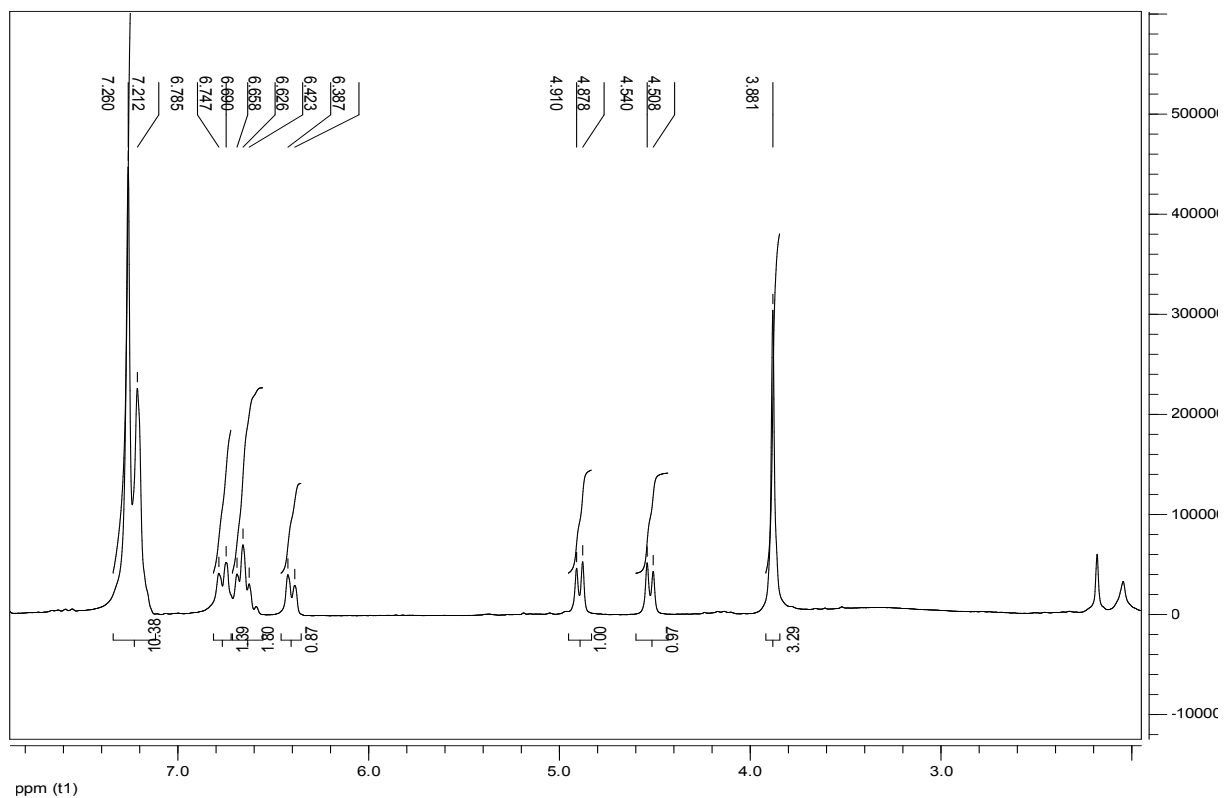

**<sup>13</sup>C NMR**

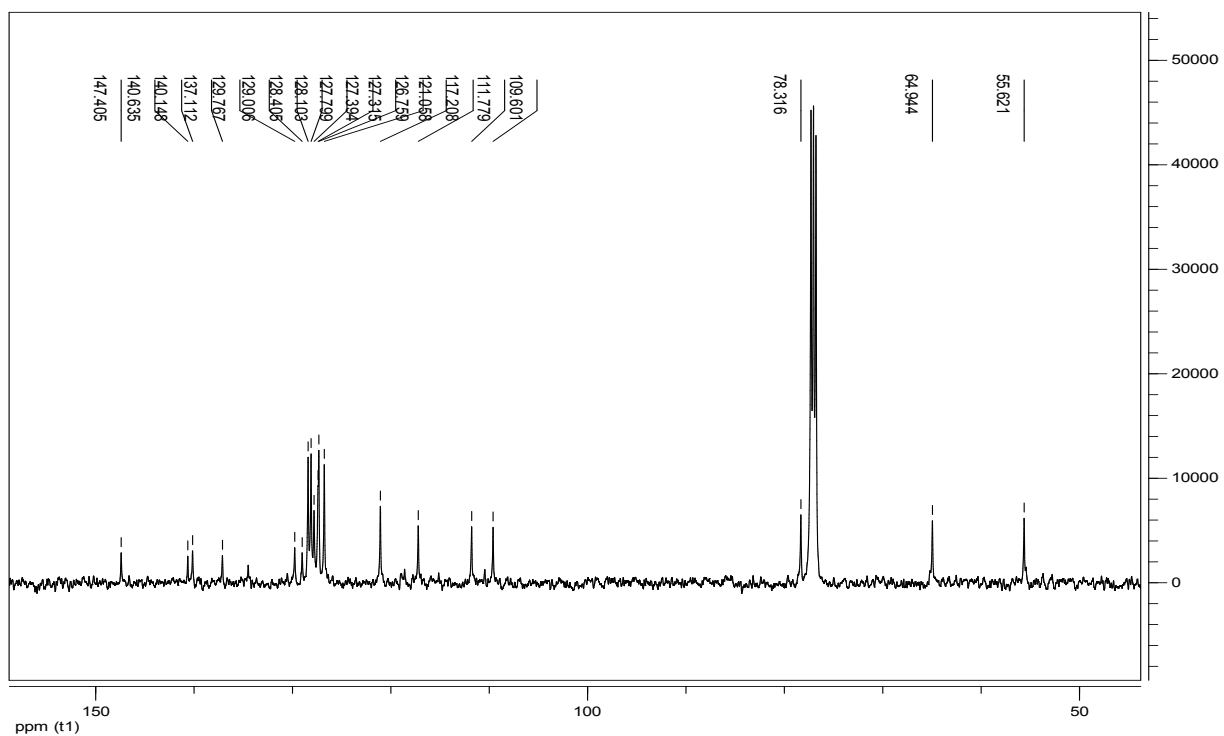

# (1*S*,2*S*)-2-(4-Chlorophenylamino)-1,2-diphenylethanol [6'f]

## <sup>1</sup>H NMR

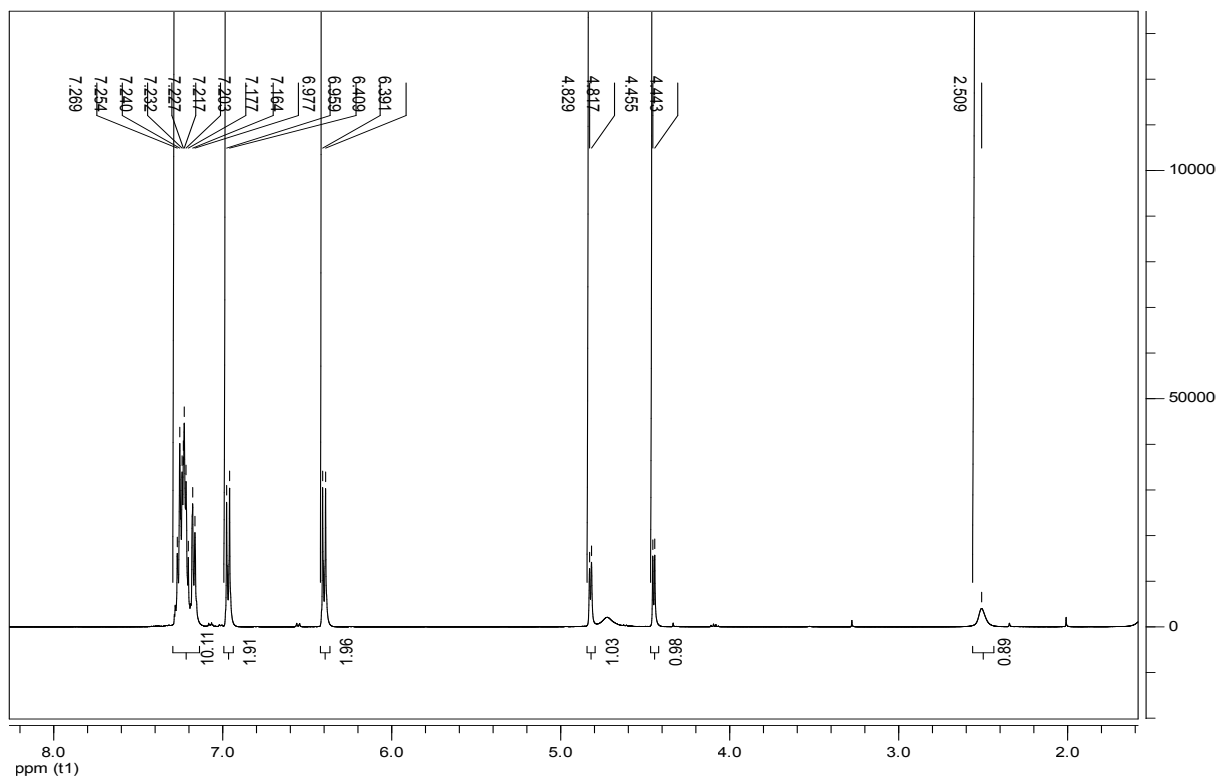

## <sup>13</sup>C NMR

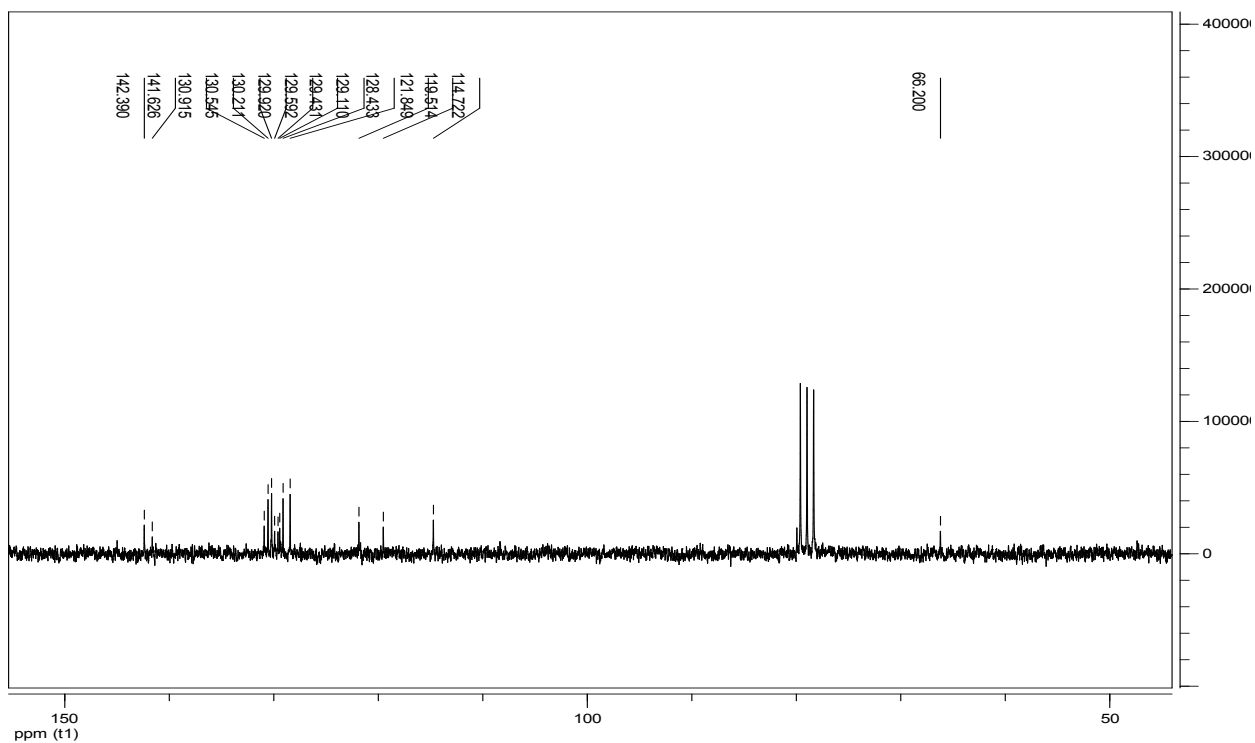

(1*S*,2*S*)-2-(2-Chlorophenylamino)-1,2-diphenylethanol [6'g]

<sup>1</sup>H NMR

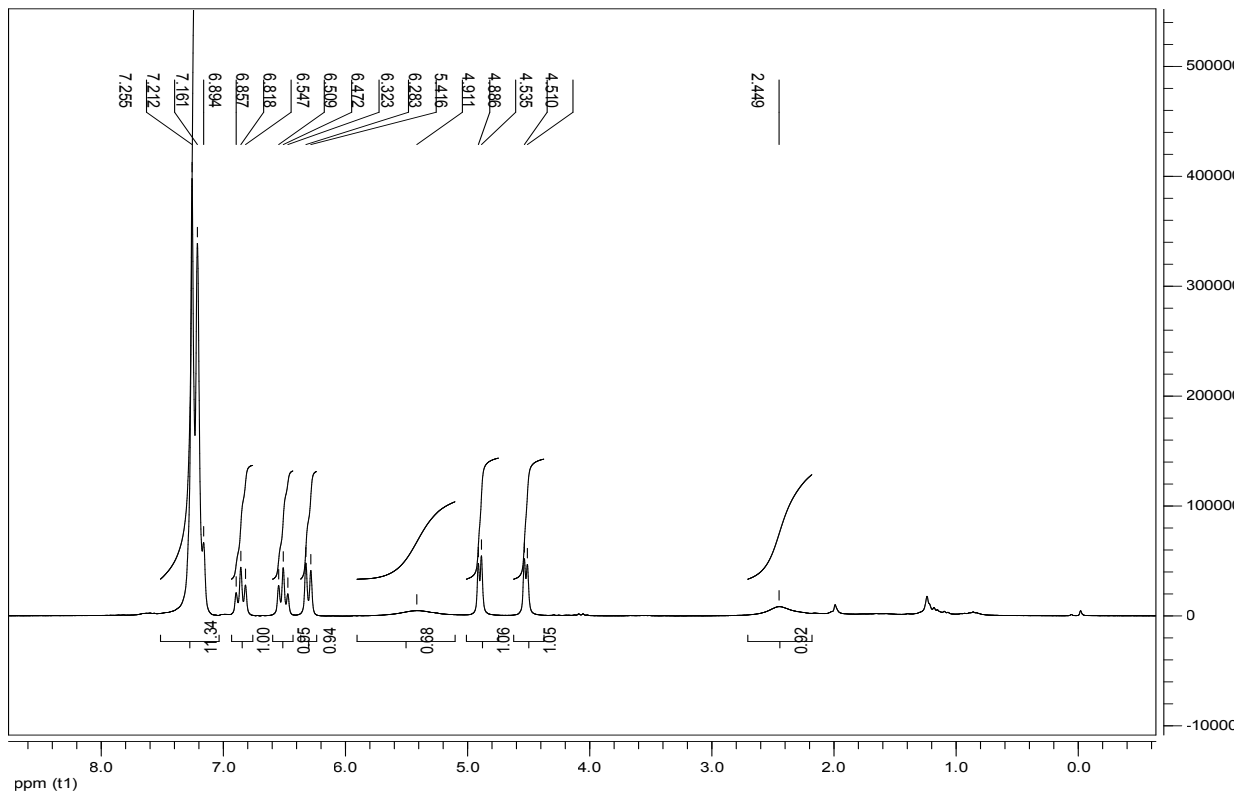

<sup>13</sup>C NMR

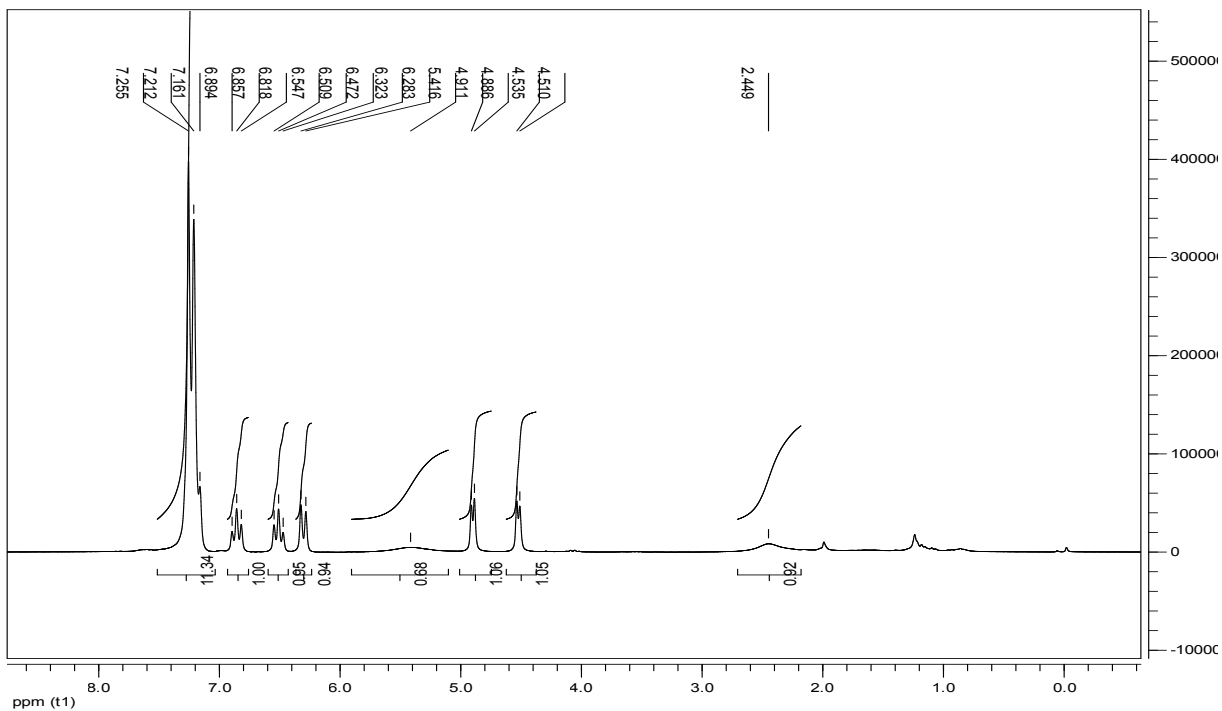

(2*S*,3*S*)-3-(Phenylamino) butan-2-ol [7'a]

<sup>1</sup>H NMR

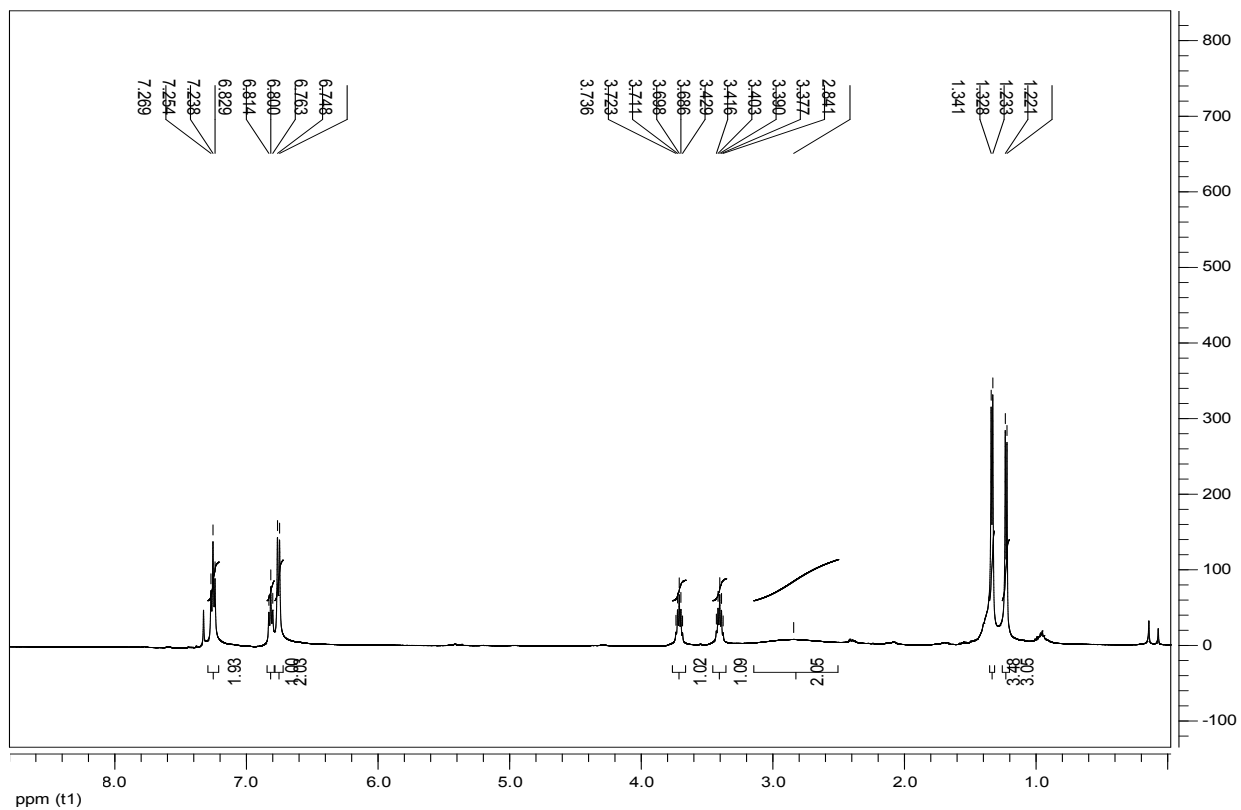

<sup>13</sup>C NMR

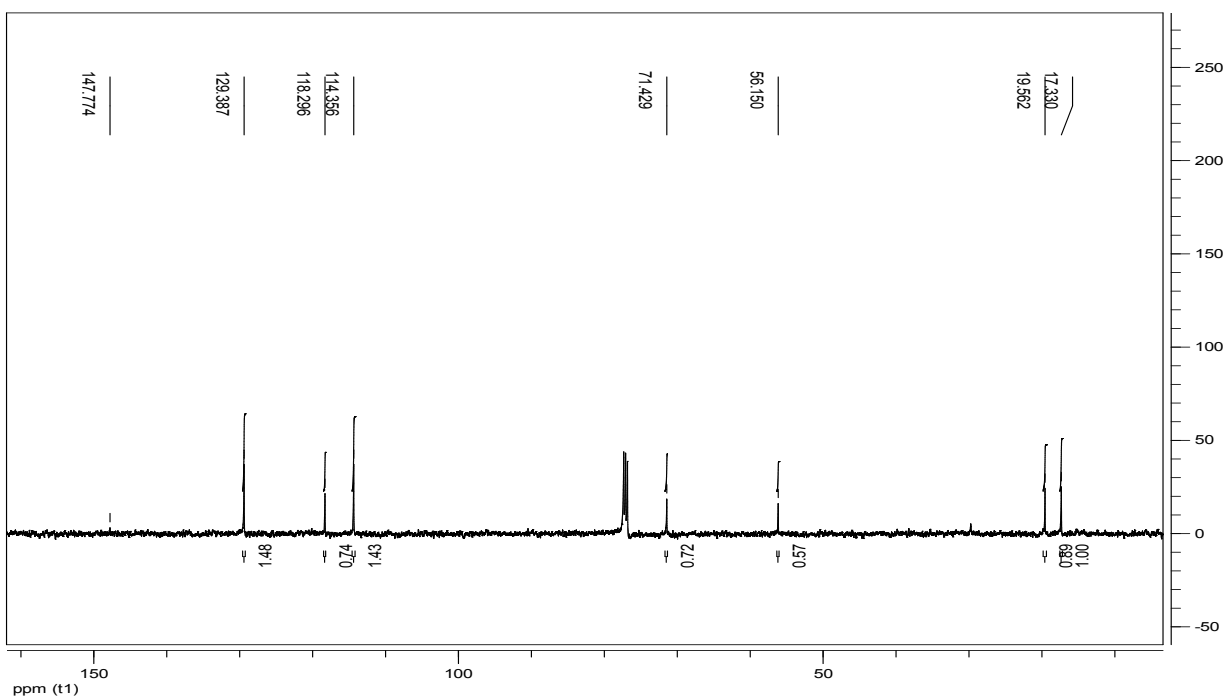



**(2*S*,3*S*)-3-(4-Methylphenylamino)butan-2-ol [7'b]**

**<sup>1</sup>H NMR**

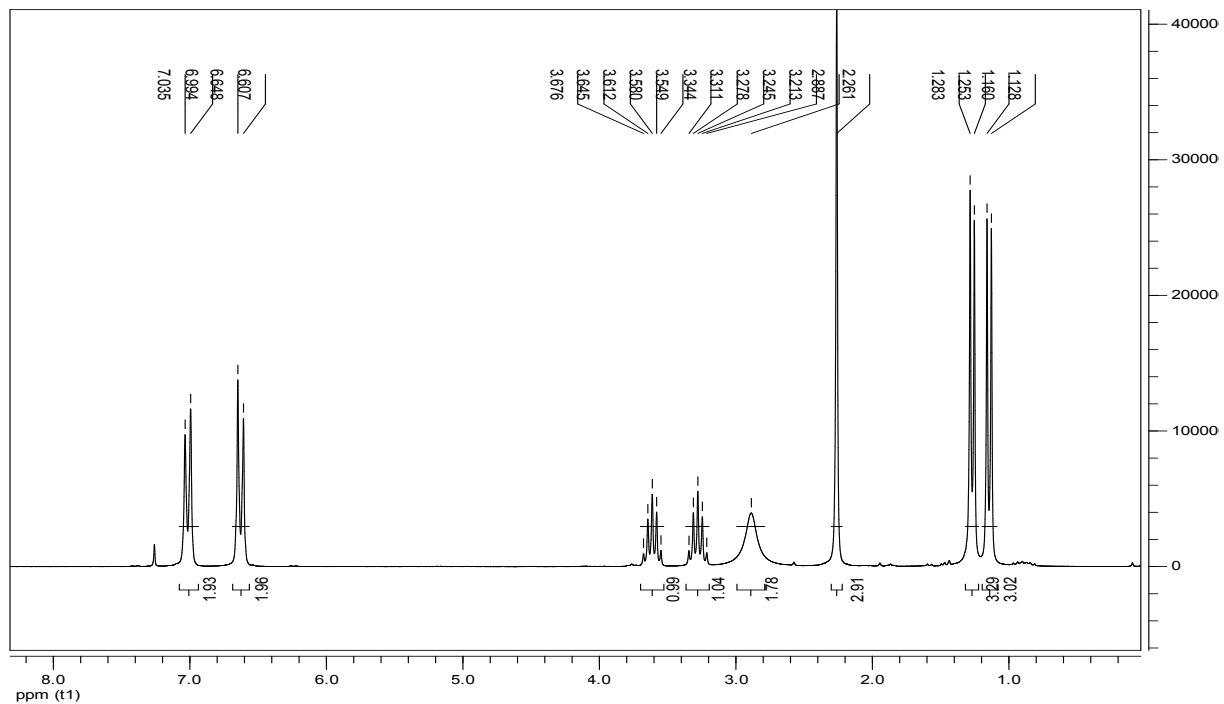

**<sup>13</sup>C NMR**

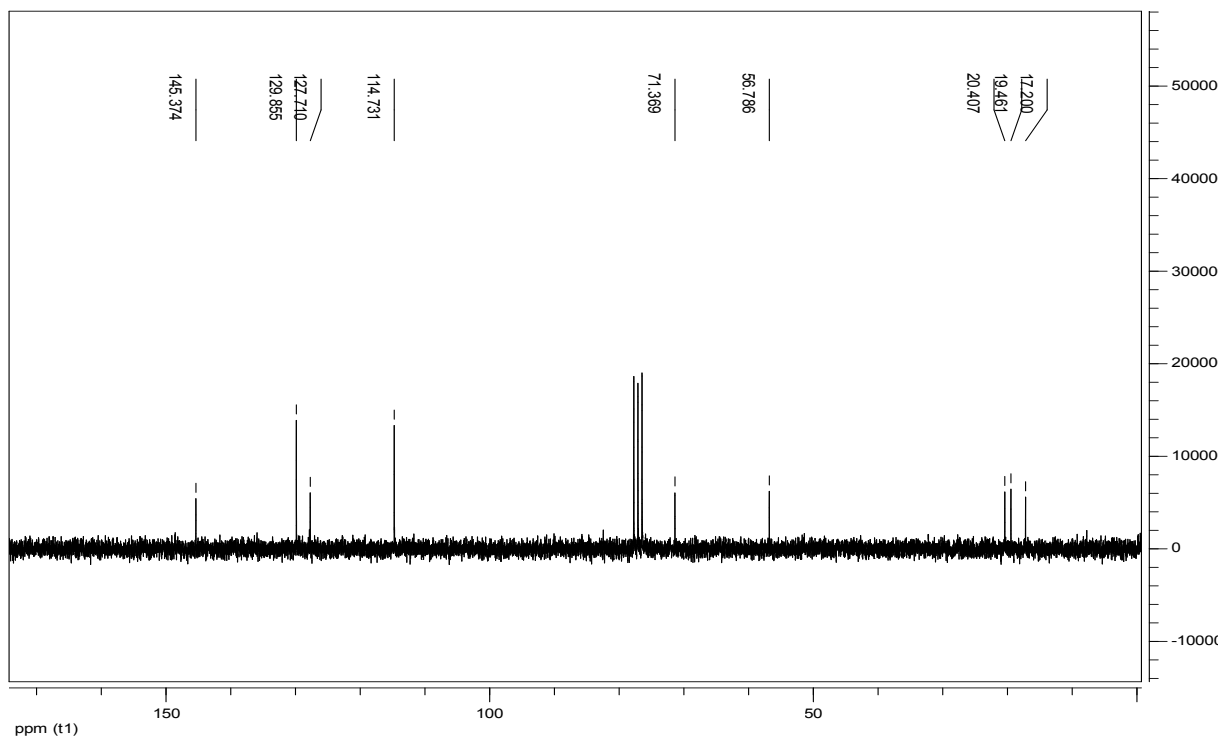

(2*S*,3*S*)-3-(4-ethylphenylamino)butan-2-ol [7°C]

<sup>1</sup>H NMR

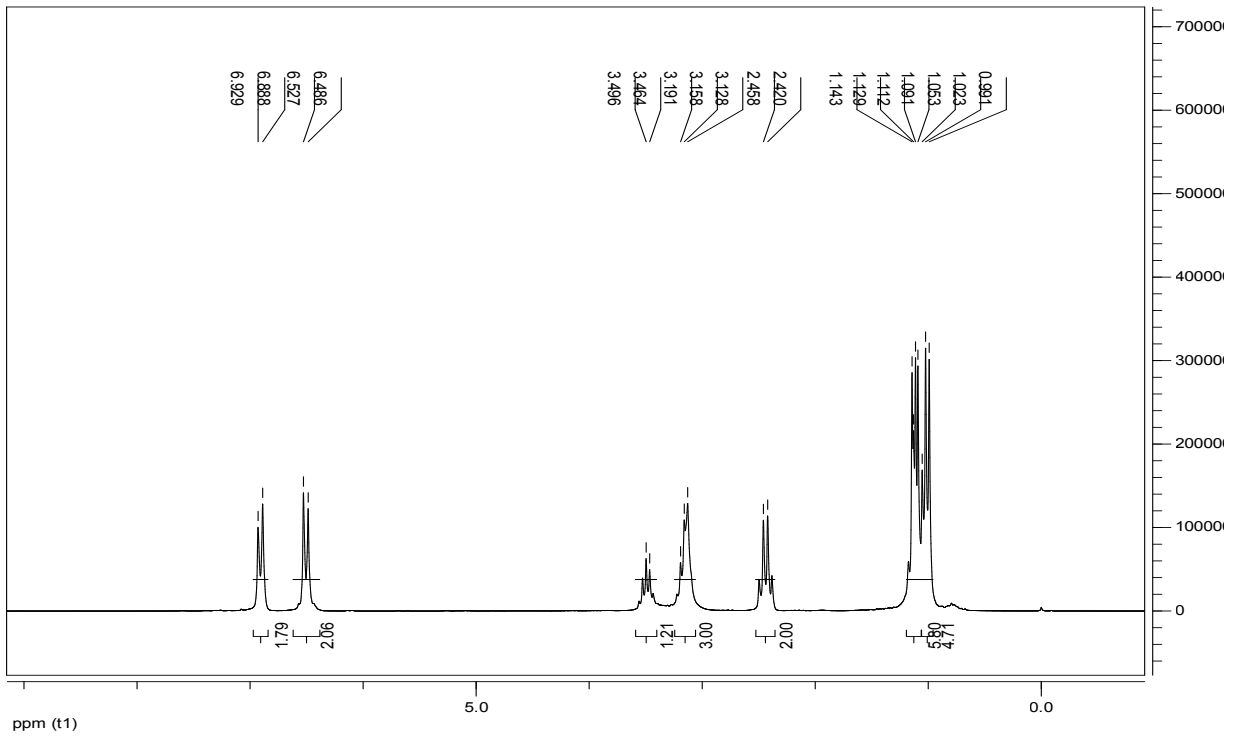

<sup>13</sup>C NMR

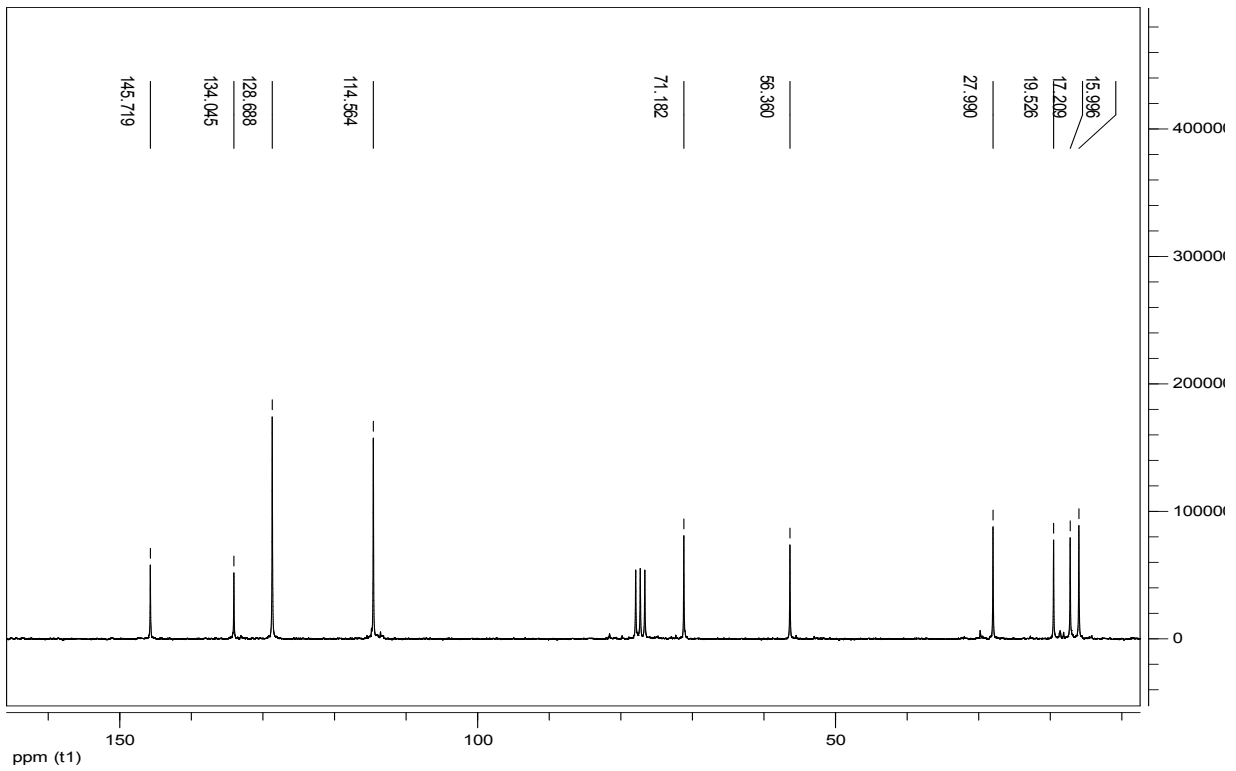

**(2*S*,3*S*)-3-(2-chlorothoxyphenylamino)butan-2-ol [7'g]**

**<sup>1</sup>H NMR**

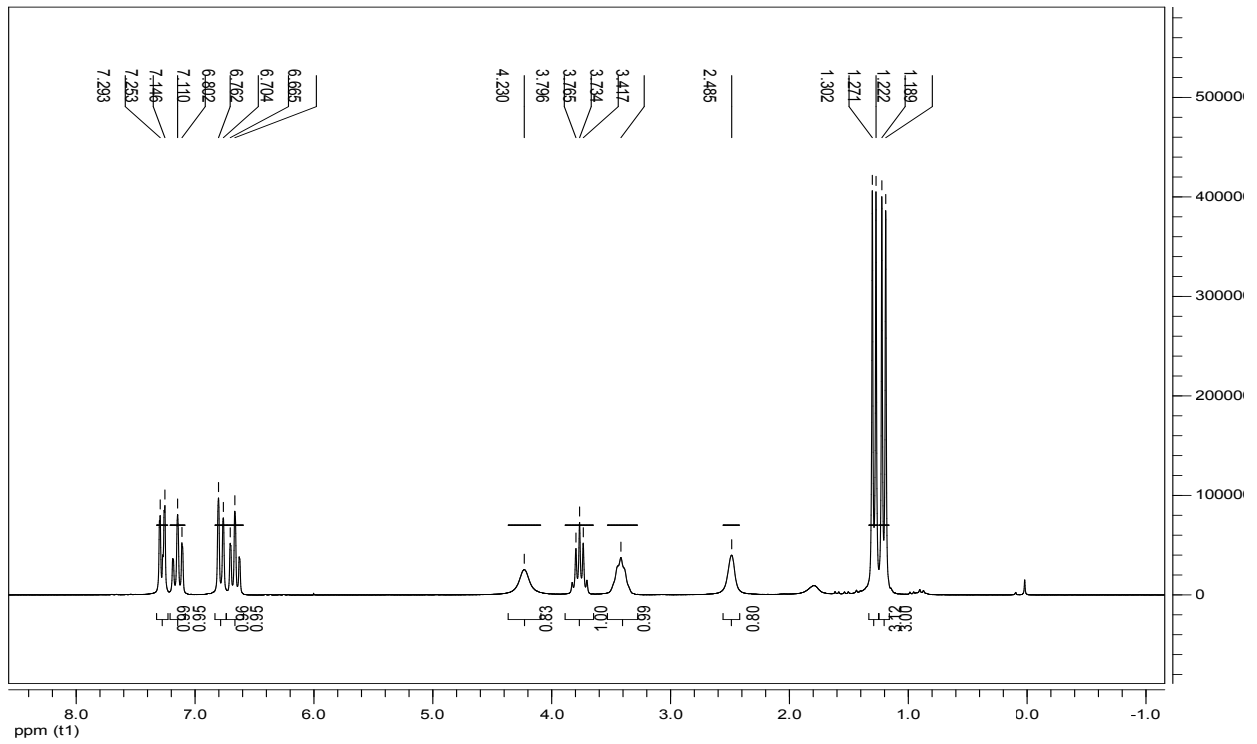

**<sup>13</sup>C NMR**

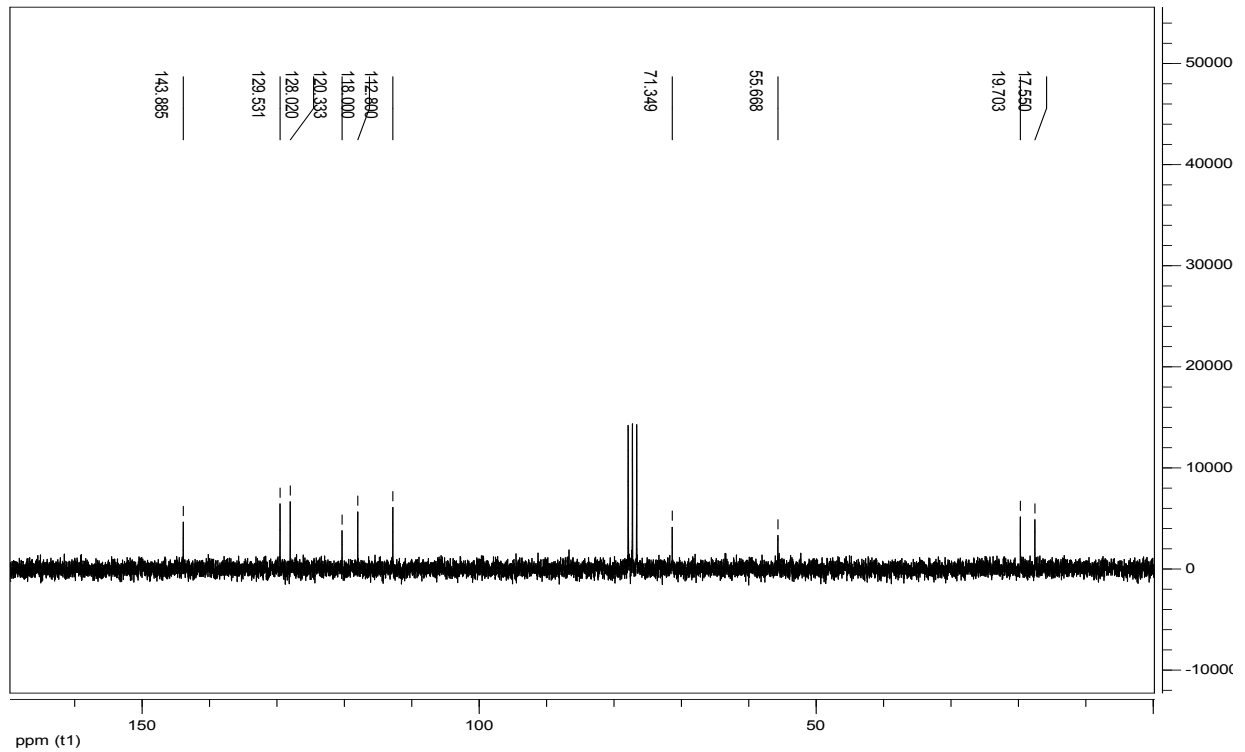

# (1*S*,2*S*)-2-(phenylamino)-cyclohexene-1-ol [8'a]

## <sup>1</sup>H NMR

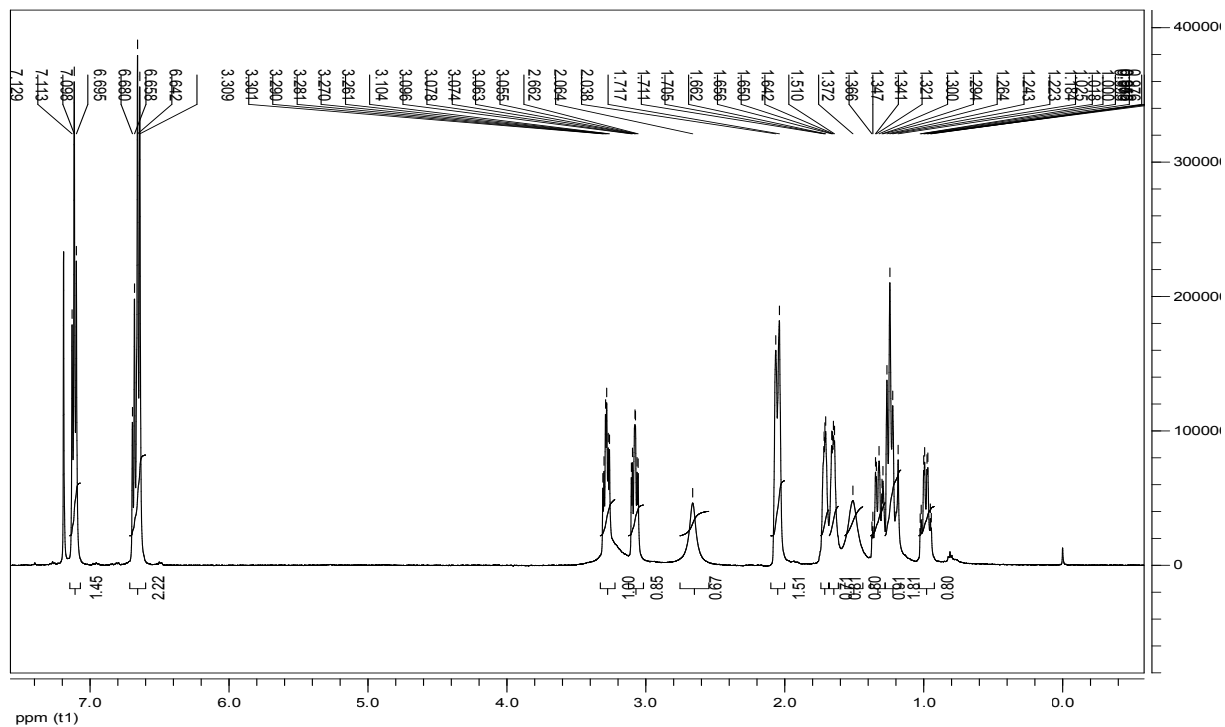

## <sup>13</sup>C NMR

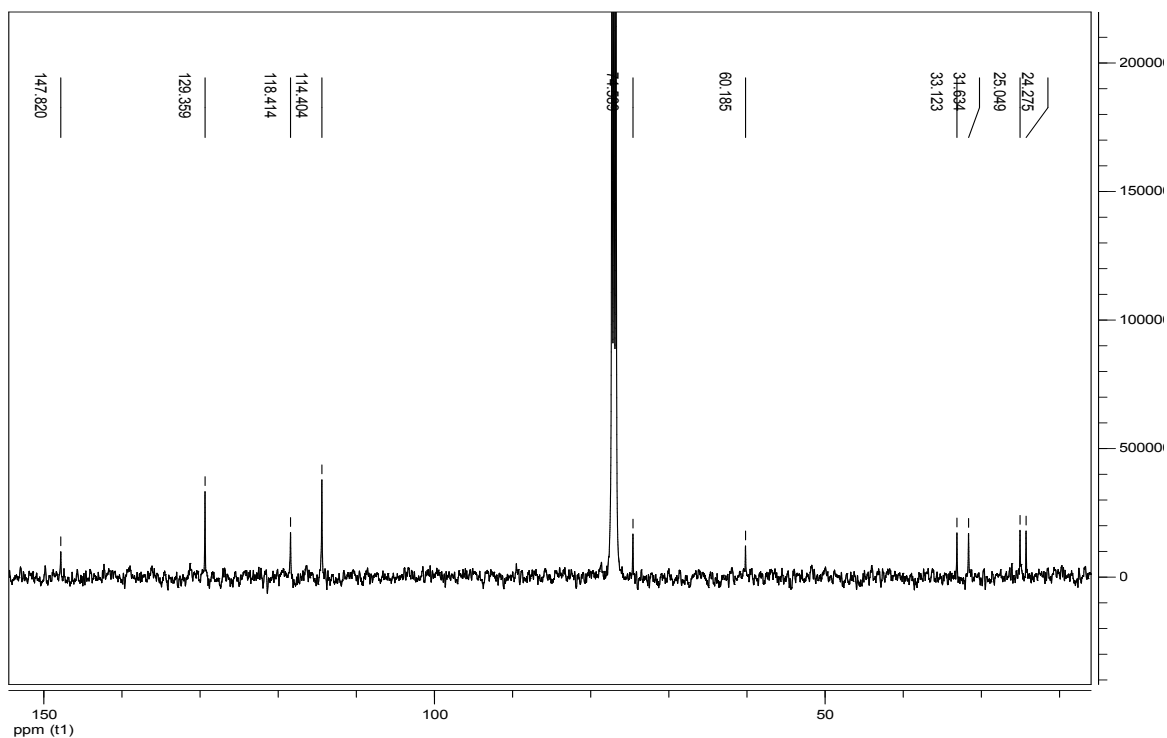

**(1*S*,2*S*)-2-(4-methylphenylamino)-cyclohexan-1-ol [8'b]**

**<sup>1</sup>H NMR**

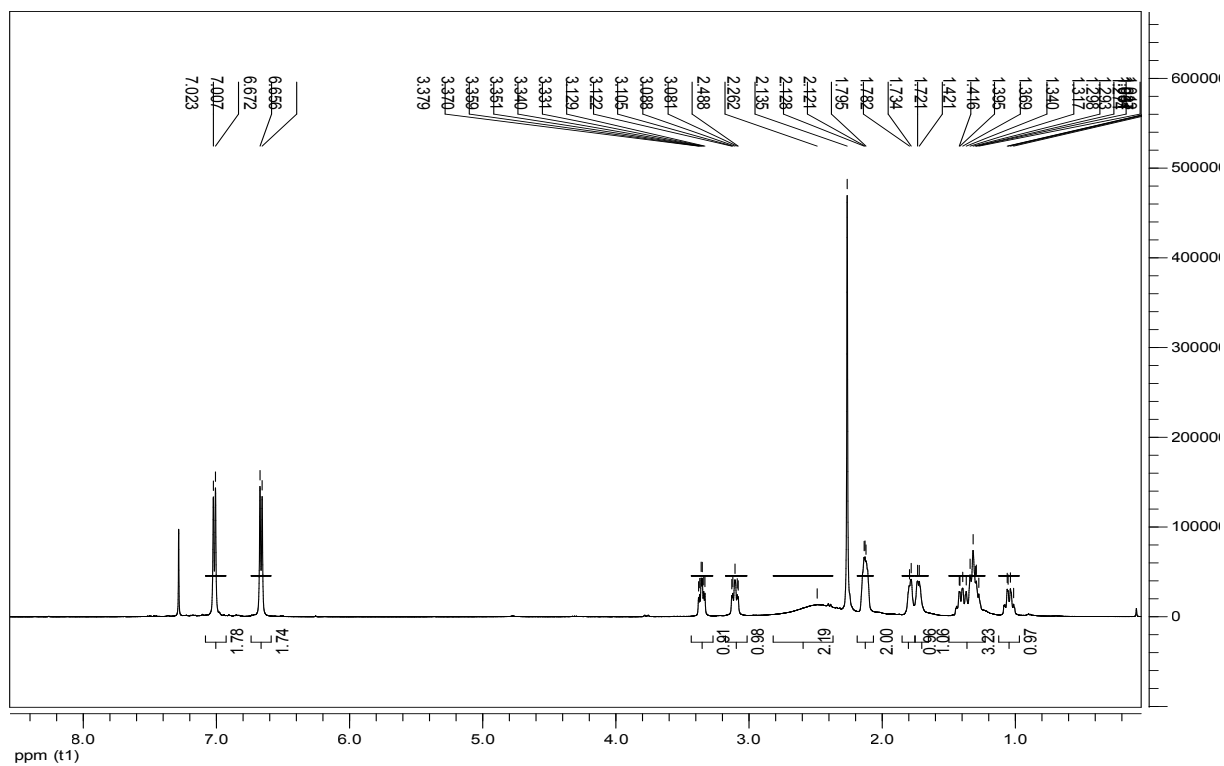

**<sup>13</sup>C NMR**

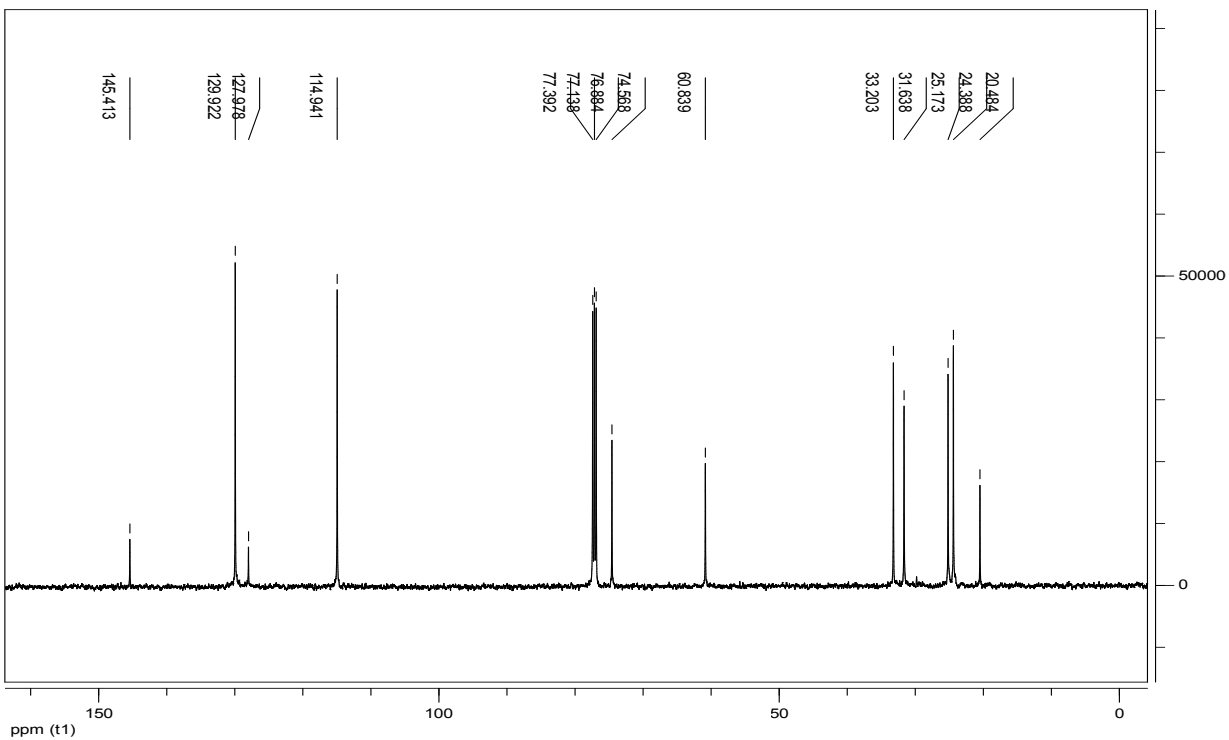

(1*S*,2*S*)-2-(4-ethylphenylamino)-cyclohexan-1-ol [8'c]

<sup>1</sup>H NMR

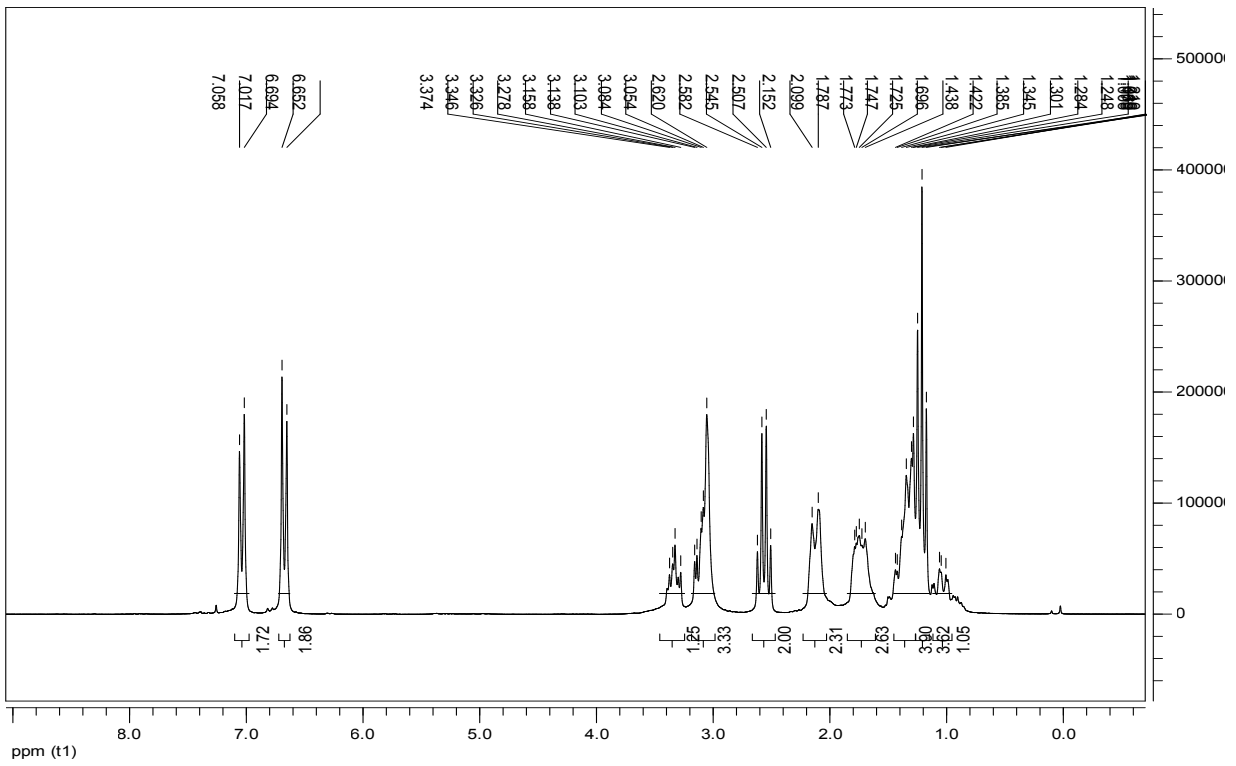

<sup>13</sup>C NMR

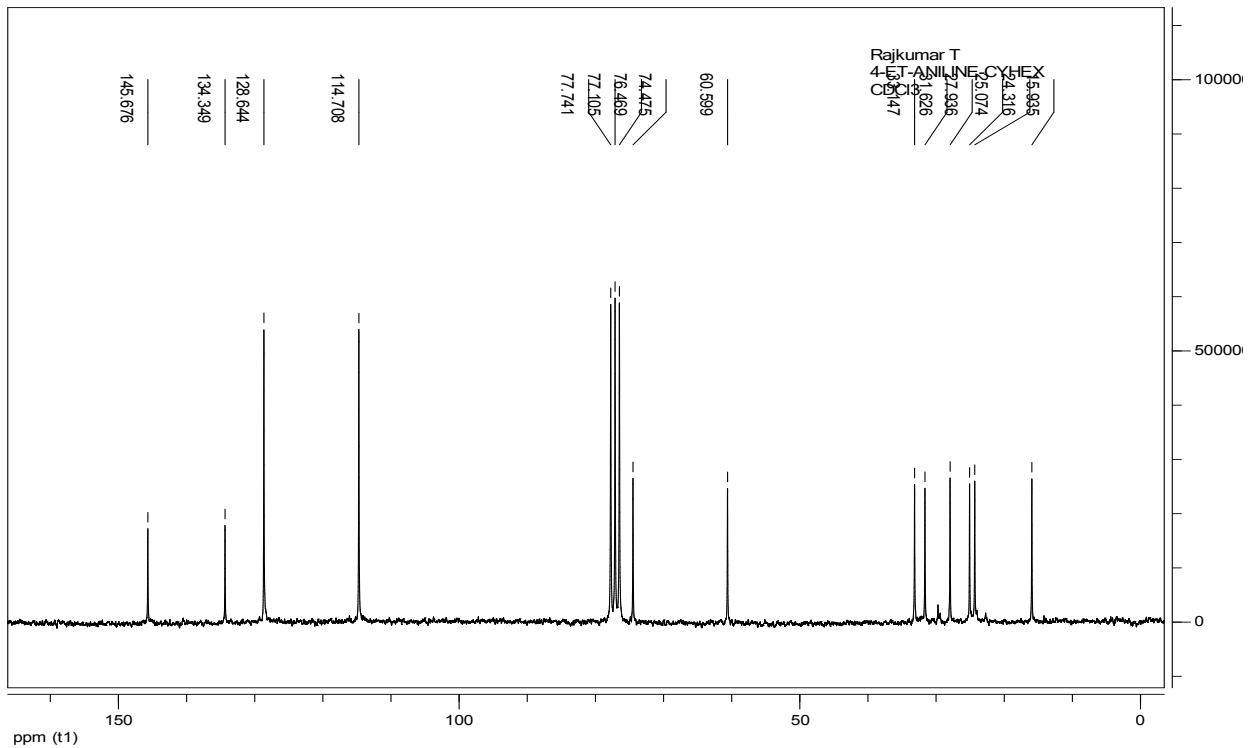

**(1*S*,2*S*)-2-(2-chlorophenylamino)-cyclohexane-1-ol [8'g]**

**<sup>1</sup>H NMR**

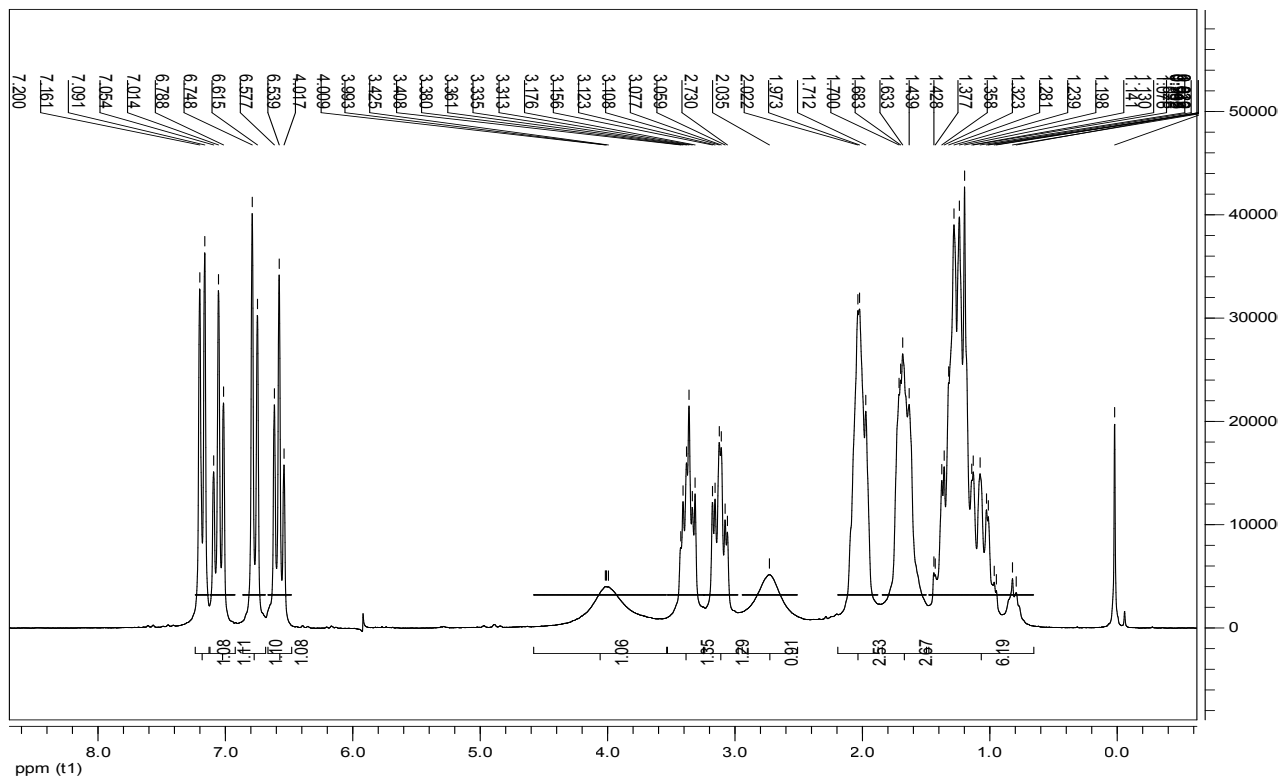

**<sup>13</sup>C NMR**

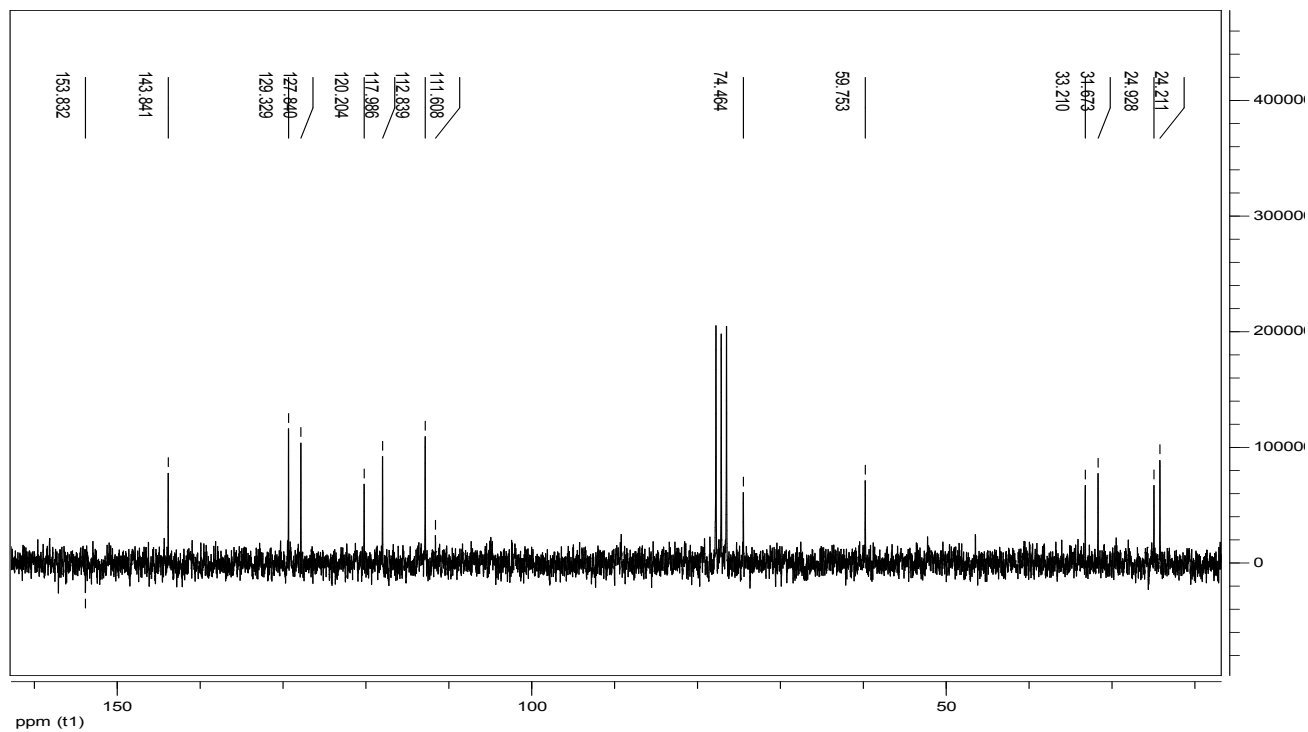

## 6. UV-Vis titration using Job's method :

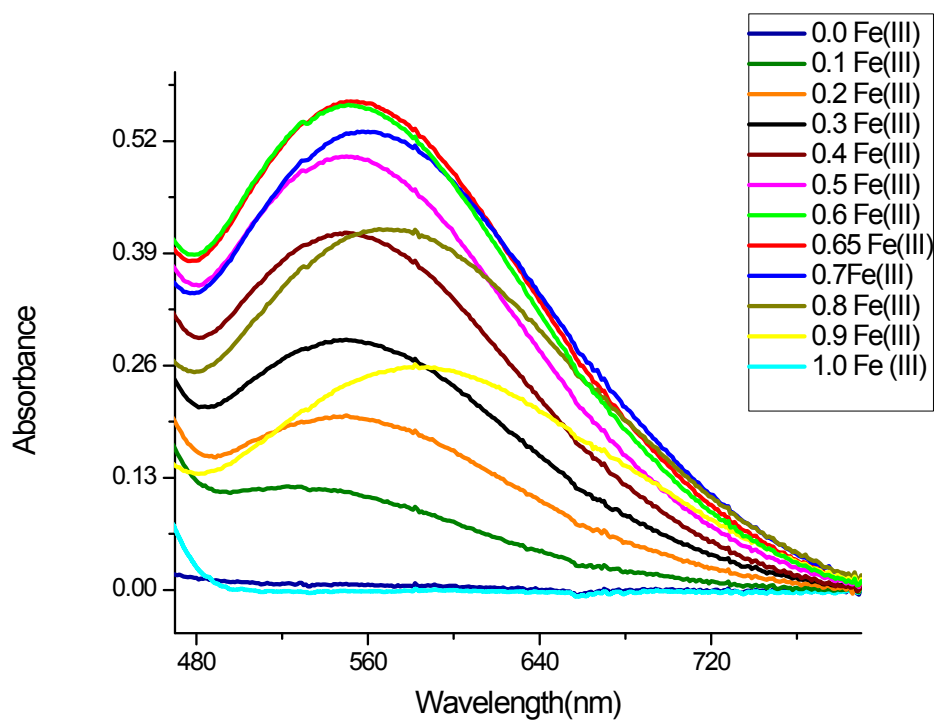

Figure S-1. UV-Vis titration using Job's method

## 7. Plausible structure, MS and MALDI spectra of the complex $[\text{Fe}_2\text{L}_5\text{a}(\text{acac})_2]$

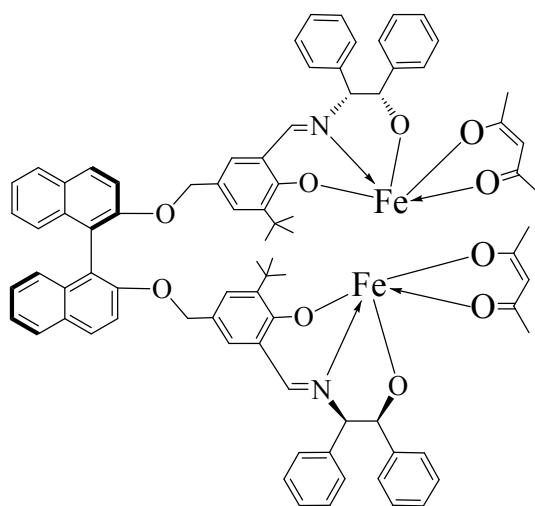

Figure S-2. Plausible structure of complex  $[\text{Fe}_2\text{L}_5\text{a}(\text{acac})_2]$



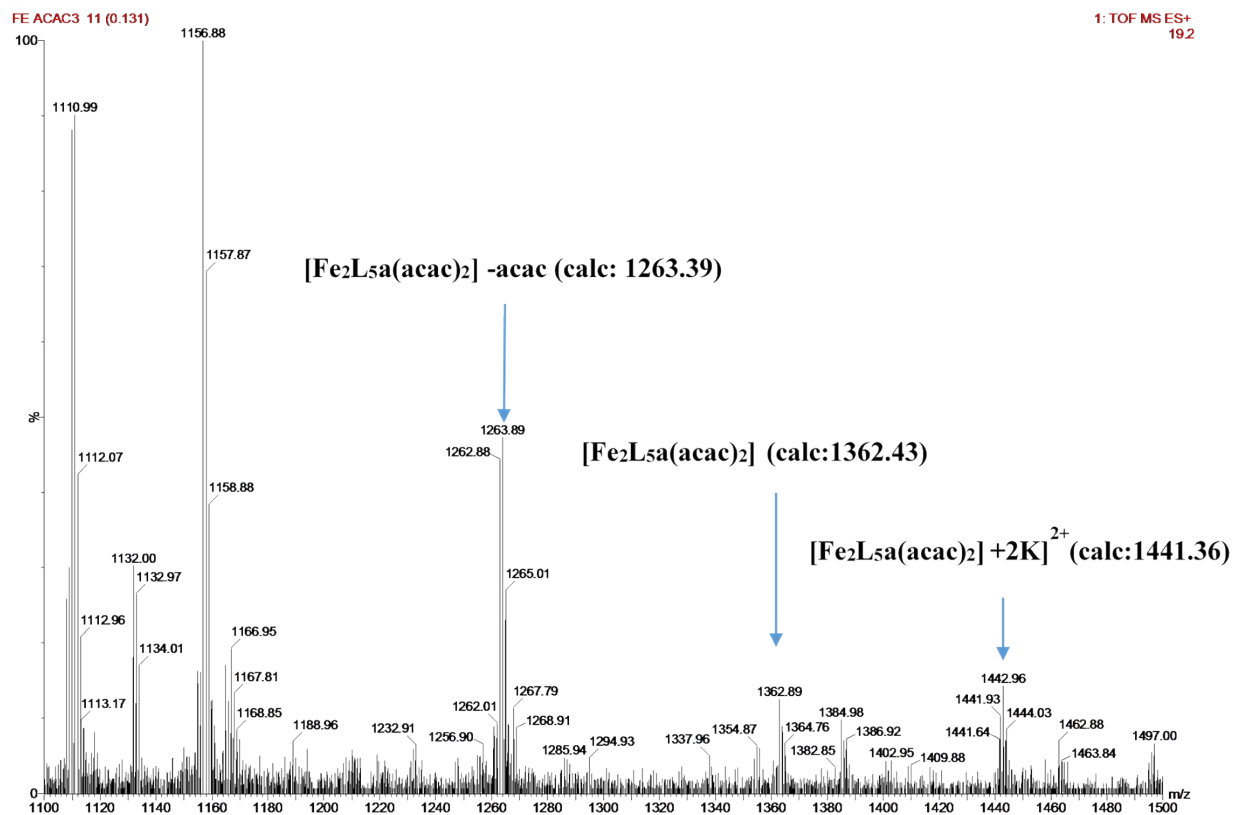

Figure S-3. MS spectra of complex [Fe<sub>2</sub>L<sub>5</sub>a(acac)<sub>2</sub>]

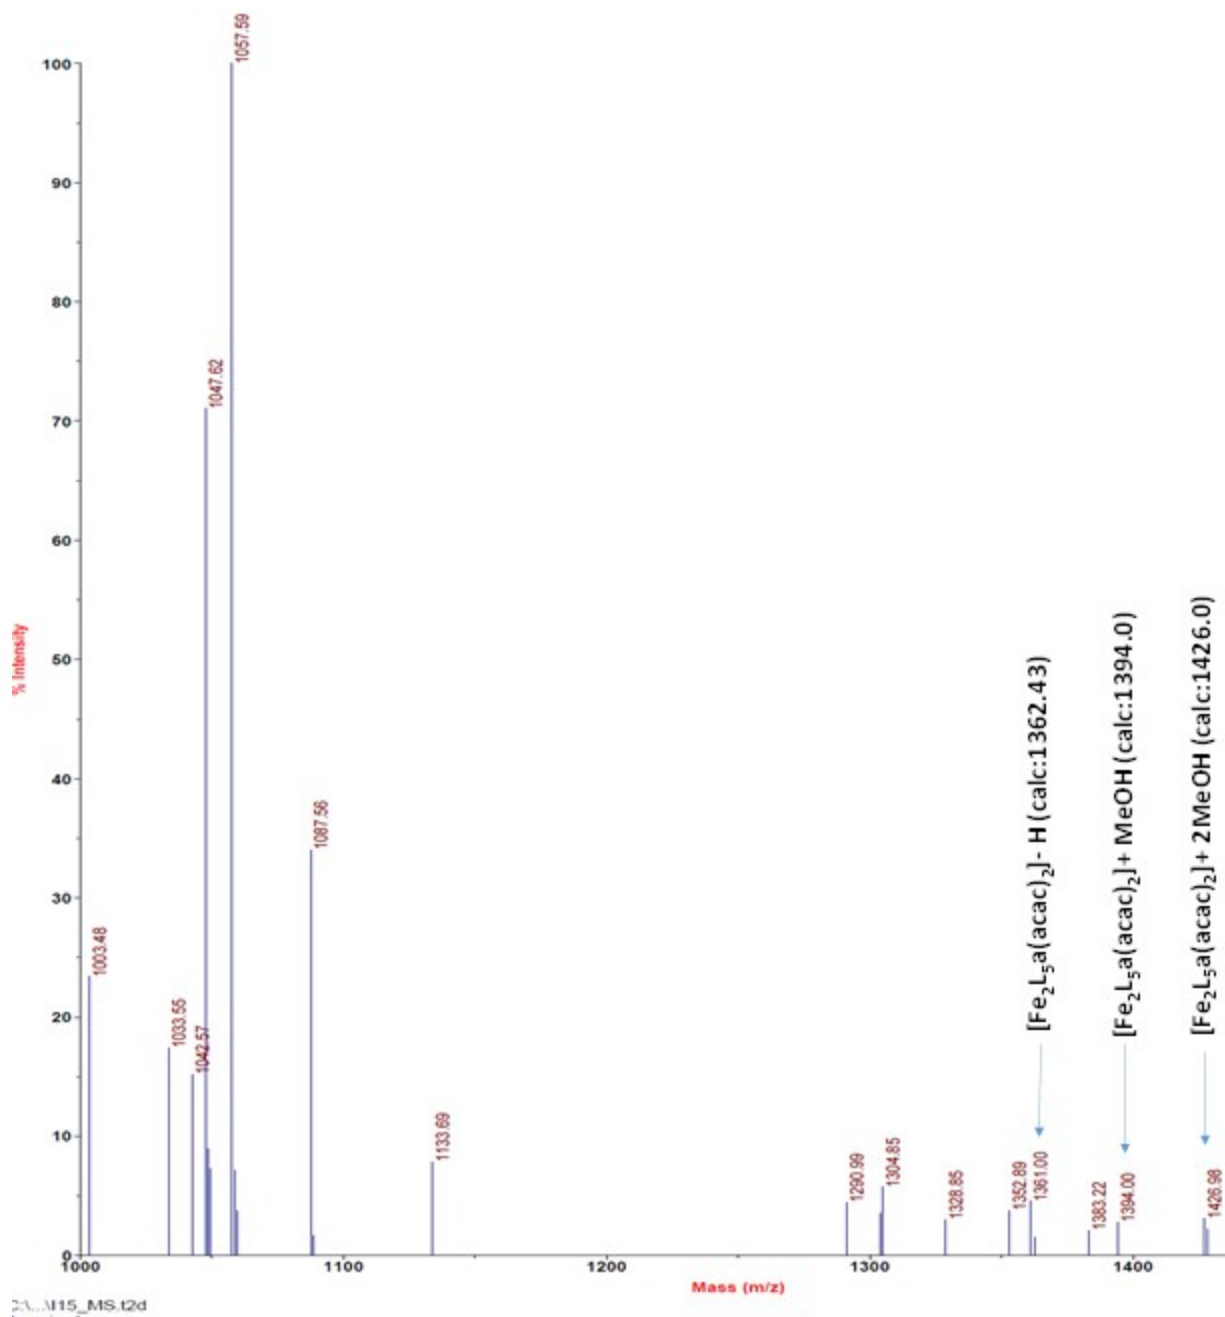

Figure S-4. MALDI spectra of complex  $[\text{Fe}_2\text{L}_5\text{a}(\text{acac})_2]$

## 8. Recyclability of the complex

The catalyst recyclability experiment was carried out by precipitating the catalyst (*in situ* generated  $\text{Fe}_2(\text{L}_4\text{h})$ ) from the reaction mixture by the addition of hexane after the first catalytic run for the ring opening of *cis*-butene oxide **7** with 4-methyl aniline **6b** at 1 mmol level under the optimized reaction conditions (Table 5, entry 2). The precipitated complex was washed thoroughly with hexane and dried under vacuum before its reuse in the next cycle. From the recycling experiments it is evident that the *in situ* formed catalyst is fairly stable and do not deteriorate during the course of ARO reaction (**Figure 5**).

## 9. ICP analysis

To check the leaching of the metal from the complex derived from  $\text{L}_4\text{h}$  with  $\text{FeCl}_3$  was done by using inductively coupled plasma (ICP) spectrometer. The supernatant obtained after removing the catalyst and the product was concentrated to remove organic solvent and then treated with conc.  $\text{HNO}_3$  to digest the metal present in the solution. This solution was make up to 100 ml with deionised water and used for ICP. The ICP results have shown no trace of metal in the supernatant obtained after removing the catalyst confirming that no metal is leached out during ARO reaction which further confirms the stability of the complex in the catalytic reaction.

## 10. Reference:

1. M. Kumar, R. I. Kureshy, D. Ghosh, N. H. Khan, S. H. R. Abdi and H. C. Bajaj, *ChemCatChem.*, 2013, **5**, 2336.
2. M. K. Choudhary, A. Das, R. I. Kureshy, M. Kumar, N. H. Khan, S. H. R. Abdi and H.C. Bajaj, *Catal. Sci. Technol* , 2014, **4**, 548.

3. R. I. Kureshy, K. J. Prathap, S. Agrawal, N. H. Khan, S. H. R. Abdi and R. V. Jasra, *Eur. J. Org. Chem.*, 2008, 3118.
4. P. K. Bera, P. Kumari, S. H. R. Abdi, N. H. Khan, R. I. Kureshy, P. S. Subramanian and H. C. Bajaj, *RSC Adv.*, 2014, **4**, 61550.
